# Supplementary material for: A mechanistic integrative computational model of macrophage polarization: Implications in human pathophysiology
Source: PLOS journal article supplement (doi:10.1371/journal.pcbi.1007468), 2019-11-18
Supplement: S1 (10.1371/journal.pcbi.1007468.s001) [file journal.pcbi.1007468.s001]

# Supporting Information File S1

## **A mechanistic integrative computational model of macrophage polarization: implications in human pathophysiology**

Chen Zhao, Adam C. Mirando, Richard J. Sové, Thalyta X. Medeiros, Brian H. Annex, Aleksander S. Popel

**Figure S1:** Complete model diagram with all nodes and reactions

**Figure S2:** Additional model calibration data of IFN- $\gamma$ -driven pathway

**Figure S3:** Additional model calibration data of IL-4-driven pathway

**Figure S4:** Additional model calibration data of hypoxia-driven pathway

**Figure S5:** Additional *in silico* investigation of pathway feedback within M1-M2 network

**Figure S6:** Temporal response of M2 markers and transcription factors under hypoxia

**Figure S7:** Parameter sensitivities under high IL-4 production

**Figure S8:** Parameter distribution after bootstrapping

**Table S1:** Complete list of model reactions and parameter values

**Table S2:** Differential equations and initial conditions of all model nodes

**Table S3:** Summary of literature sources used in model calibration

**Protocol S1:** Additional information regarding model formulation and analysis

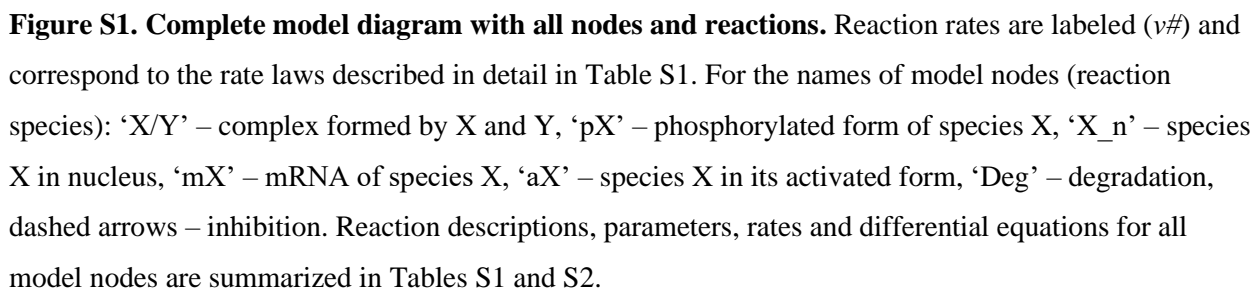

**Figure S2**

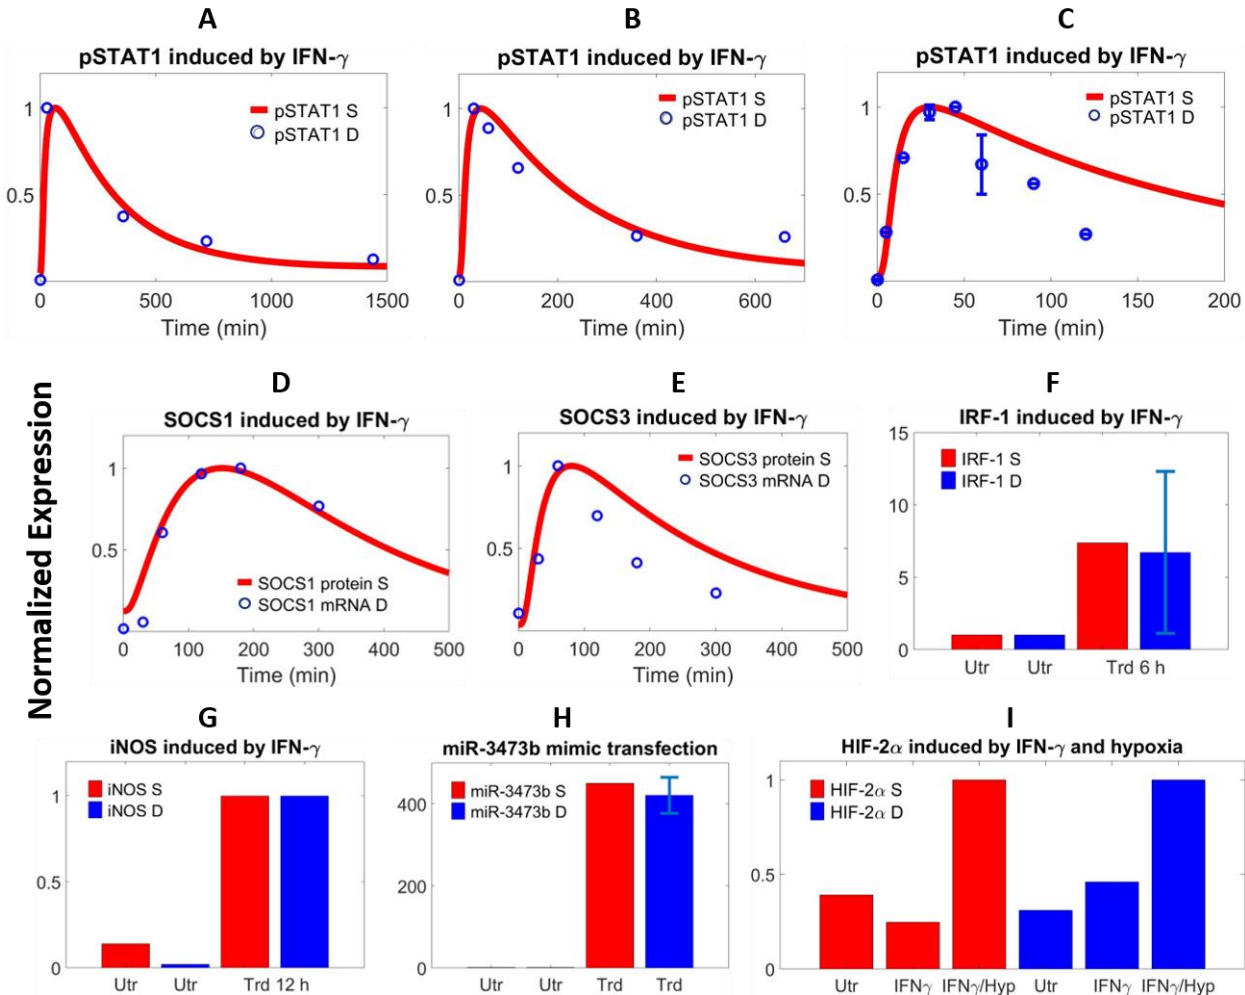

**Figure S2. Additional model calibration data of IFN- $\gamma$ -driven pathway.** Comparisons between model

simulations and literature experimental data of IFN- $\gamma$ -induced (A-C) STAT1 activation at 5 ng/ml (1), 10

ng/ml (2), and 20 ng/ml of IFN- $\gamma$  (3, 4), (D-E) upregulation of SOCS1 and SOCS3 (data is mRNA

expression) (5), (F) increase in IRF-1 expression at 6 h (6), and (G) increase in iNOS expression at 12 h

(7). (H) Data and simulated expression level of miR-3473b at 24 h after mimic transfection (8). (I)

Hypoxia in combination with IFN- $\gamma$  can significantly induce HIF-2 $\alpha$  expression (for IFN- $\gamma$  alone,

simulation suggested a mild decrease while data suggested an insignificant increase in HIF-2 $\alpha$ ) (9). (A-I)

All experimental data are measured in macrophage cell lines and values are for protein levels unless noted

otherwise. Y-axes show normalized expression respectively (A-E: simulations and data are normalized to

the maximum expression; F, H: normalized to the no-treatment/time 0 expression; G: normalized to the

expression at 12 h; I: normalized to the expression under IFN- $\gamma$  treatment with hypoxia). (D-E) For

induction of SOCS1/3, data in terms of SOCS1/3 mRNA expression are compared with simulation

(SOCS1/3 protein level), given that SOCS proteins are highly labile (direct protein measurements are

scarce) and that Wormald et al. reported a tight temporal correlation between signaling-induced

expression of SOCS1/3 protein and mRNA (10). S – simulation, D – literature data, Utr – untreated, Trd –

IFN- $\gamma$  treated, Hyp – hypoxia.

Figure S3

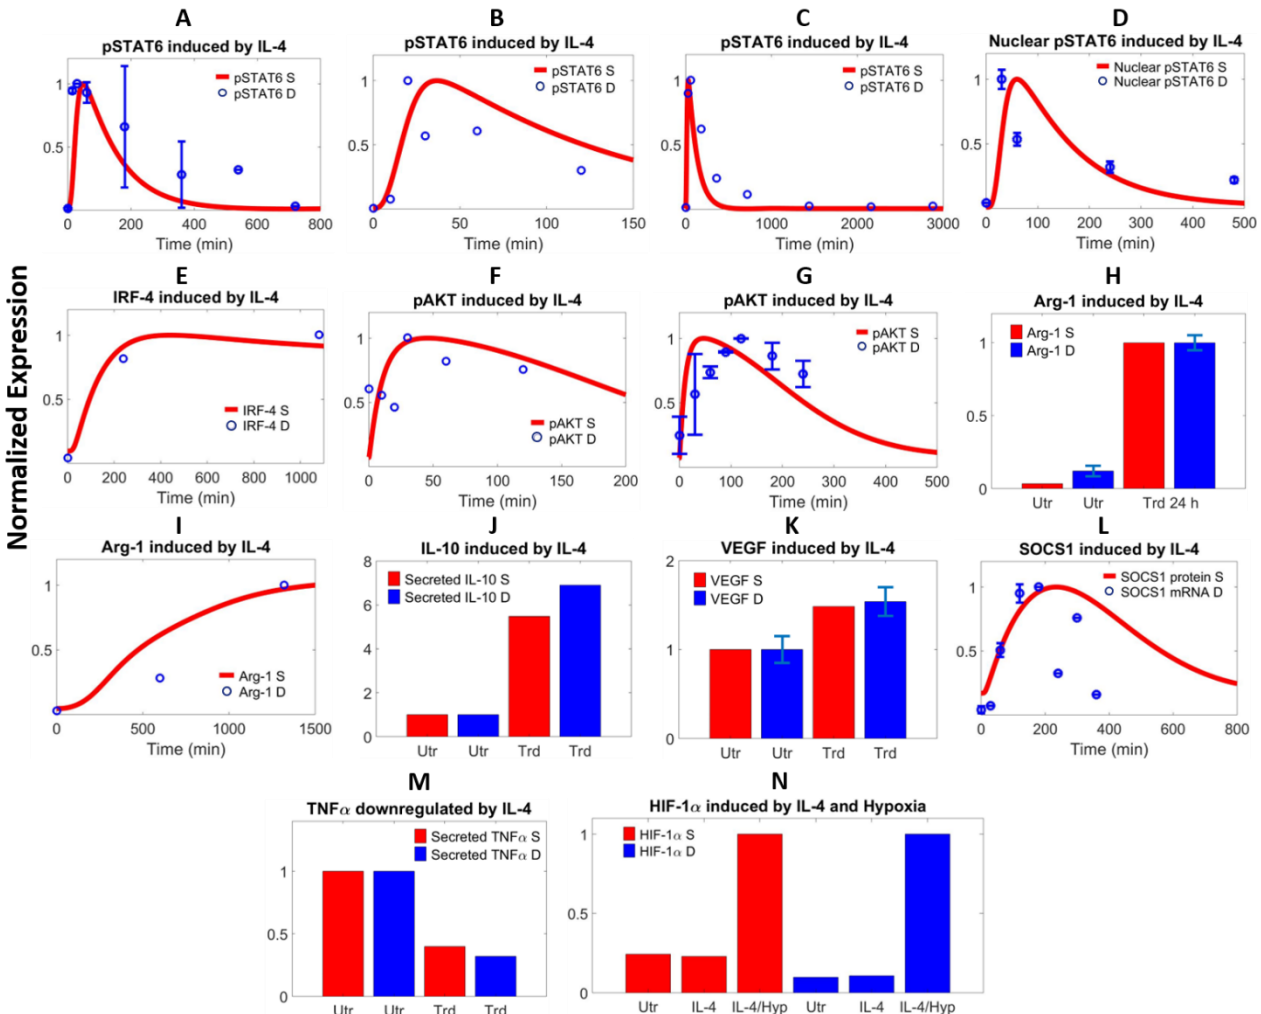

**Figure S3. Additional model calibration data of IL-4-driven pathway.** Comparisons between model simulations and published experimental data of IL-4-induced (A-C) STAT6 activation at 10 ng/ml (5, 11, 12), 50 ng/ml (13) and 100 nM IL-4 (14), (D) phosphorylated STAT6 in nucleus (15), (E) increase in IRF-4 expression (16), (F-G) AKT activation at 50 ng/ml (17) and 20 ng/ml IL-4 (18), (H-I) increase in Arg-1 production (15, 19), (J) increase in IL-10 production at 24 h (20), (K) increase in VEGF production (21), (L) SOCS1 induction (5), and (M) inhibition of TNF $\alpha$  production at 24 h (20). (N) Simulation and data show that hypoxia can stabilize HIF-1 $\alpha$  protein while IL-4 stimulation has no effect (9). (A-N) All experimental data are measured in macrophage cell lines and values are for protein levels unless noted otherwise. Y-axes show normalized expression respectively (A-G, I, L: simulations and data are normalized to the maximum expression; J, K, M: normalized to the no-treatment/time 0 expression; H: normalized to the expression at 24 h; N: normalized to the expression under IL-4 treatment with hypoxia). (H) For Arg-1 production, data in terms of Arg-1 activity (formation of urea from arginine) is compared with simulation (Arg-1 protein level). (K) For VEGF production, data in terms of intracellular VEGF level is compared with simulation (secreted VEGF level). (L) For SOCS1 induction, data in terms of SOCS1 mRNA level is compared with simulation (SOCS1 protein level), given the reasoning stated in Figures S2D-E. S – simulation, D – literature data, Utr – untreated, Trd – IL-4 treated, Hyp – hypoxia.

**Figure S4**

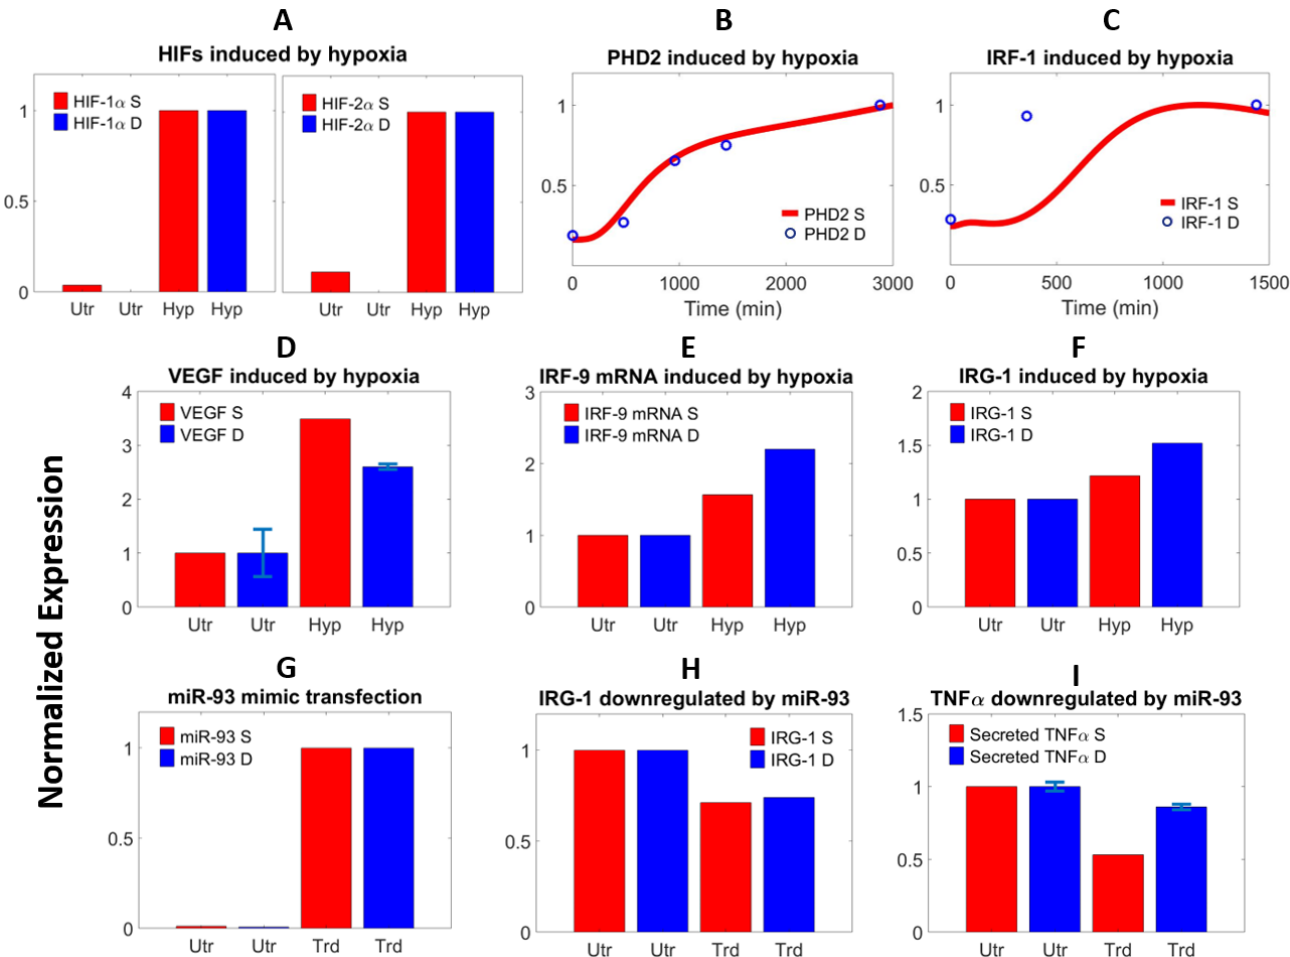

**Figure S4. Additional model calibration data of hypoxia-driven pathway.** Comparisons between model simulations and literature experimental data of hypoxia-induced (A) stabilization of HIF-1 $\alpha$  and HIF-2 $\alpha$  at 18 h (22), (B) PHD upregulation (23), (C) IRF-1 induction (24), (D) VEGF production at 24 h (25), (E) de-suppression of IRF-9 (26) and (F) downstream upregulation of IRG-1 at 12 h (26). (G) Data and simulated expression level of miR-93 before and after 24 h of mimic transfection, which leads to downregulation of (H) IRG-1 abundance at 24 h (26). (I) Transfection of miR-93 mimic decreases TNF $\alpha$  production at 12 h under hypoxia (26). (A-I) All experimental data are measured in macrophage cell lines (except for B, which is in Hela cells) and values are for protein levels unless noted otherwise. Y-axes show normalized expression respectively (A: simulation and data are normalized to the expression under hypoxia; B, C: normalized to the maximum expression; D, E, F, H: normalized to the no-treatment expression; G: normalized to the miR-93 expression at 24 h after transfection; I: normalized to the expression under 12 h of hypoxia without miR-93 mimic). (D) For VEGF production, data in terms of intracellular VEGF level is compared with simulation (secreted VEGF level). (F and H) For IRG-1 regulation, data in terms of IRG-1 mRNA level is compared with simulation (IRG-1 protein level). S – simulation, D – literature data, Utr – untreated, Trd – treated with miR-93 mimic, Hyp – hypoxia.

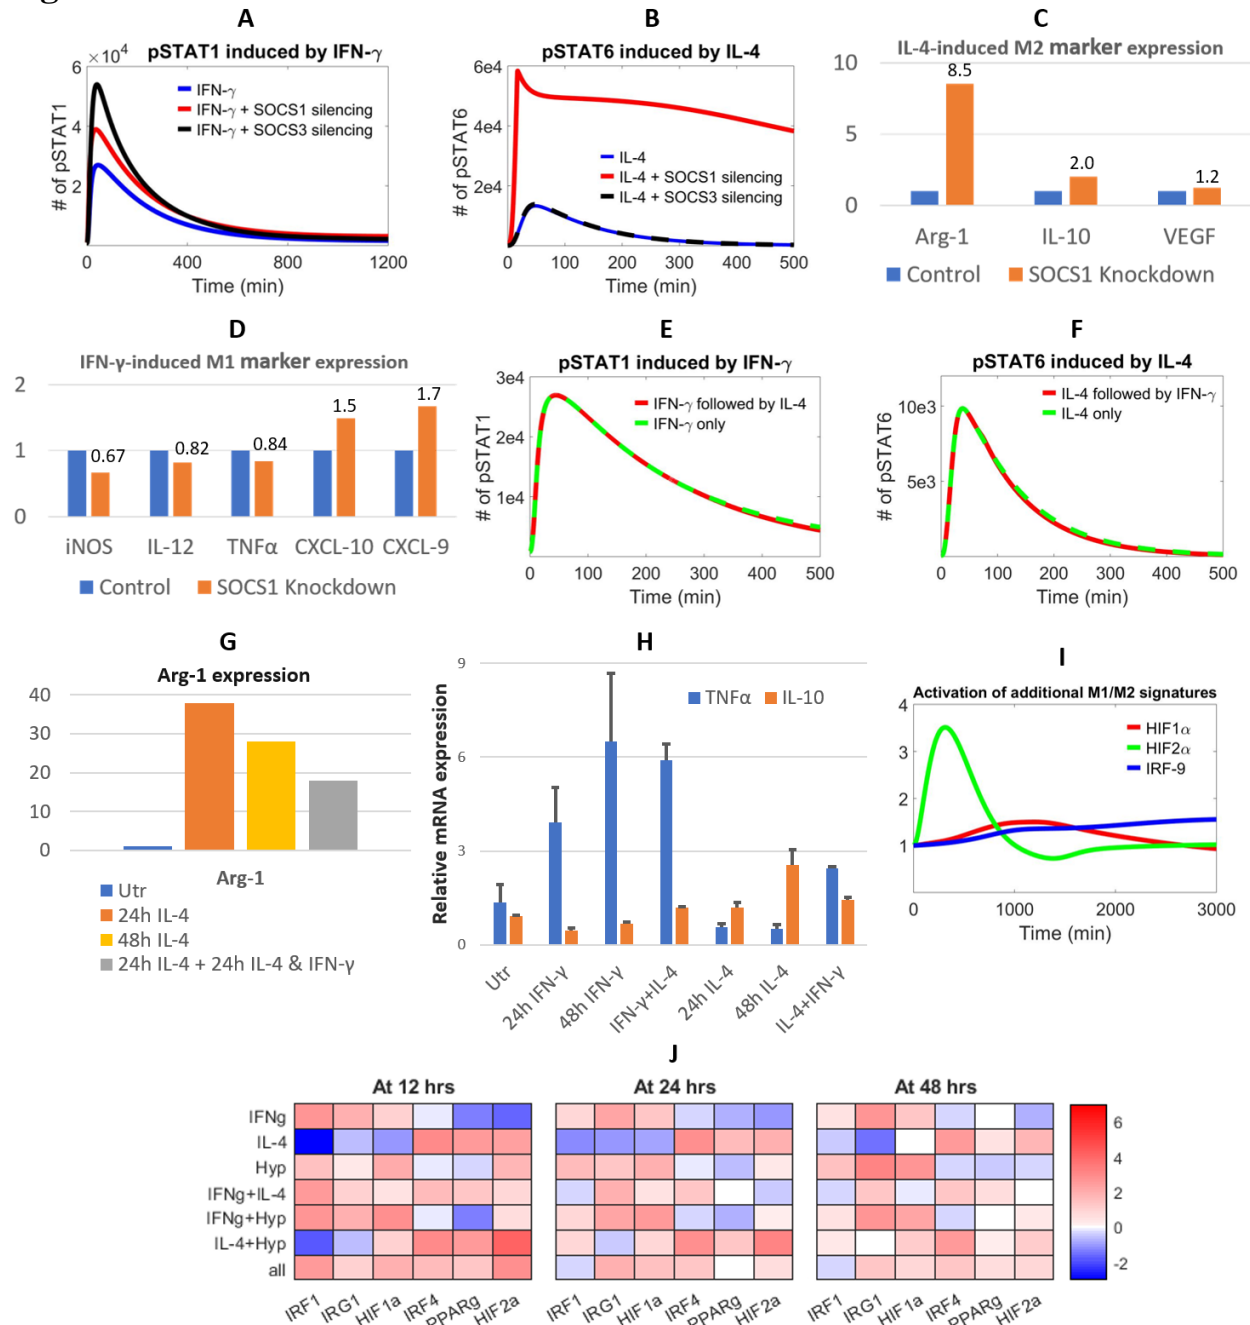

**Figure S5. Additional *in silico* investigation of pathway feedback within M1-M2 network.** (A)

Silencing of SOCS1 or SOCS3 in macrophages can promote activation of STAT1 by IFN- $\gamma$ . (B) SOCS1 silencing, but not SOCS3 silencing, can markedly boost STAT6 activation by IL-4. (A-B) Silencing is modeled as 0x initial level with 0x production. Knockdown of SOCS1 (modeled as 0.3x initial level with 0.3x production) (C) promotes IL-4-induced M2 marker expression and (D) differentially influences M1 marker expression in response to IFN- $\gamma$ . In the scenarios of IFN- $\gamma$  stimulation followed by the addition of IL-4 (at 4 h), or IL-4 stimulation followed by the addition of IFN- $\gamma$  (at 1 hr), there is no obvious change of (E) STAT1 or (F) STAT6 activation. (G) The addition of a second stimulus IFN- $\gamma$  (at 24 h post IL-4 stimulation) can antagonize the expression pattern of Arg-1 induced by IL-4. (H) RT-qPCR analysis



(results presented as mean  $\pm$  SEM, n=3) of TNF $\alpha$  and IL-10 gene expression in THP-1 cells stimulated with 24 and 48 h of IFN- $\gamma$  (or IL-4), and 24 h of IFN- $\gamma$  (or IL-4) then another 24 h of IFN- $\gamma$  plus IL-4 (labeled as IFN $\gamma$ +IL-4 or IL-4+IFN $\gamma$ ). (I) Temporal expression profiles of HIFs and IRF-9 when macrophages are stimulated with IFN- $\gamma$  and IL-4 simultaneously. (J) Temporal relative protein expression patterns of six M1-M2 signature transcription factors in macrophages under seven different stimulation conditions ('A+B' means simultaneous stimulation, 'all' means IFN- $\gamma$ +IL-4+hypoxia, all expression levels are normalized to the untreated/time 0 levels and then log<sub>2</sub> transformed). (A-J) All simulation results are protein levels (except CXCL10 is mRNA level). (C,D,G,I) Y-axes show relative expression (normalized to untreated/control/time 0 levels). Simulated treatment doses are 10 ng/ml IFN- $\gamma$  and 10 ng/ml IL-4 for (A-D), 10 ng/ml IFN- $\gamma$  and 20 ng/ml IL-4 for (E-F), 20 ng/ml IFN- $\gamma$  and 20 ng/ml IL-4 for (G), 10 ng/ml IFN- $\gamma$  and 5 ng/ml IL-4 for (I-J). Utr – untreated, Hyp – hypoxia (2% oxygen for J).

**Figure S6**

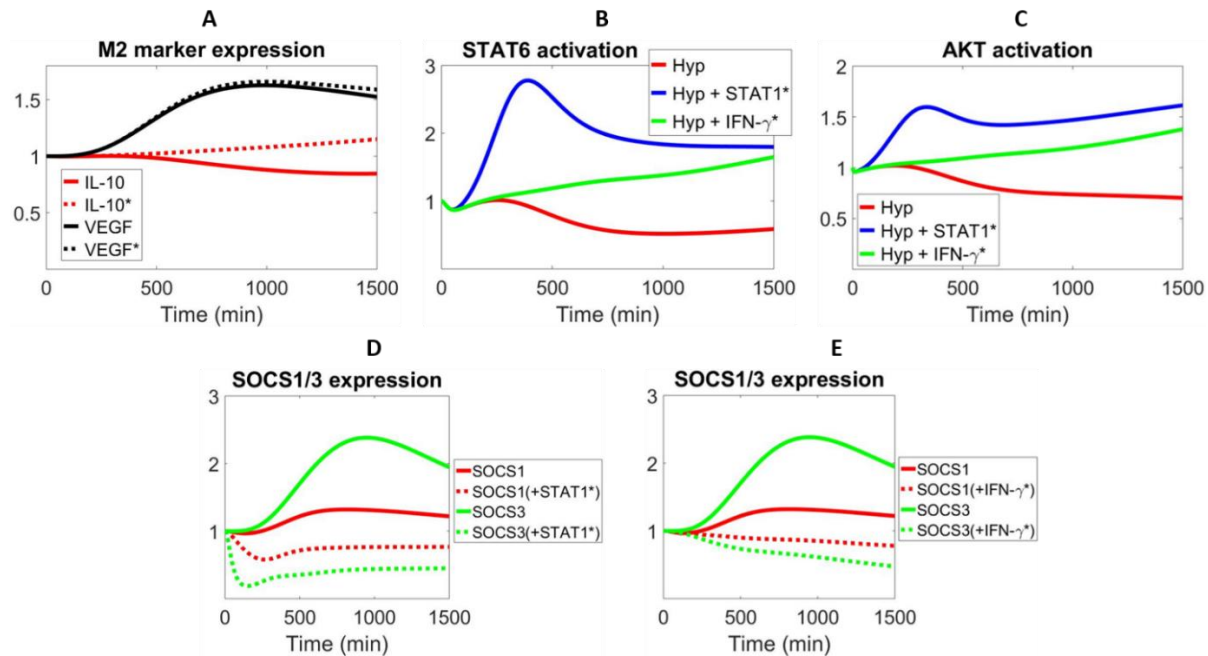

**Figure S6. Temporal response of M2 markers and transcription factors under hypoxia.** (A) Inhibition of IFN- $\gamma$  production under hypoxia (dashed lines) can upregulate the expression of M2 markers IL-10 and VEGF (marginal effect), compared to hypoxia alone (solid lines). Simulations show stronger temporal activation of (B) pSTAT6 and (C) pAKT under hypoxia in combination with IFN- $\gamma$  inhibition or STAT1 inhibition, compared to hypoxia alone. SOCS1 and SOCS3 expression are reduced under hypoxia with either (D) STAT1 or (E) IFN- $\gamma$  inhibition (dashed lines), compared to hypoxia alone (solid lines). STAT1\* means inhibition of STAT1 activation, IFN- $\gamma$ \* means inhibition of IFN- $\gamma$  production. Inhibition of IFN- $\gamma$  is simulated by setting its production rate to 10% of the original value; STAT1 inhibition is simulated as a 90% decrease in the binding rate between STAT1 and activated IFN- $\gamma$  receptor complex. (A-E) Expression levels are normalized to their respective t=0 values (e.g. normoxia, unstimulated). Hyp – hypoxia. All simulation results are protein levels.

**Figure S7**

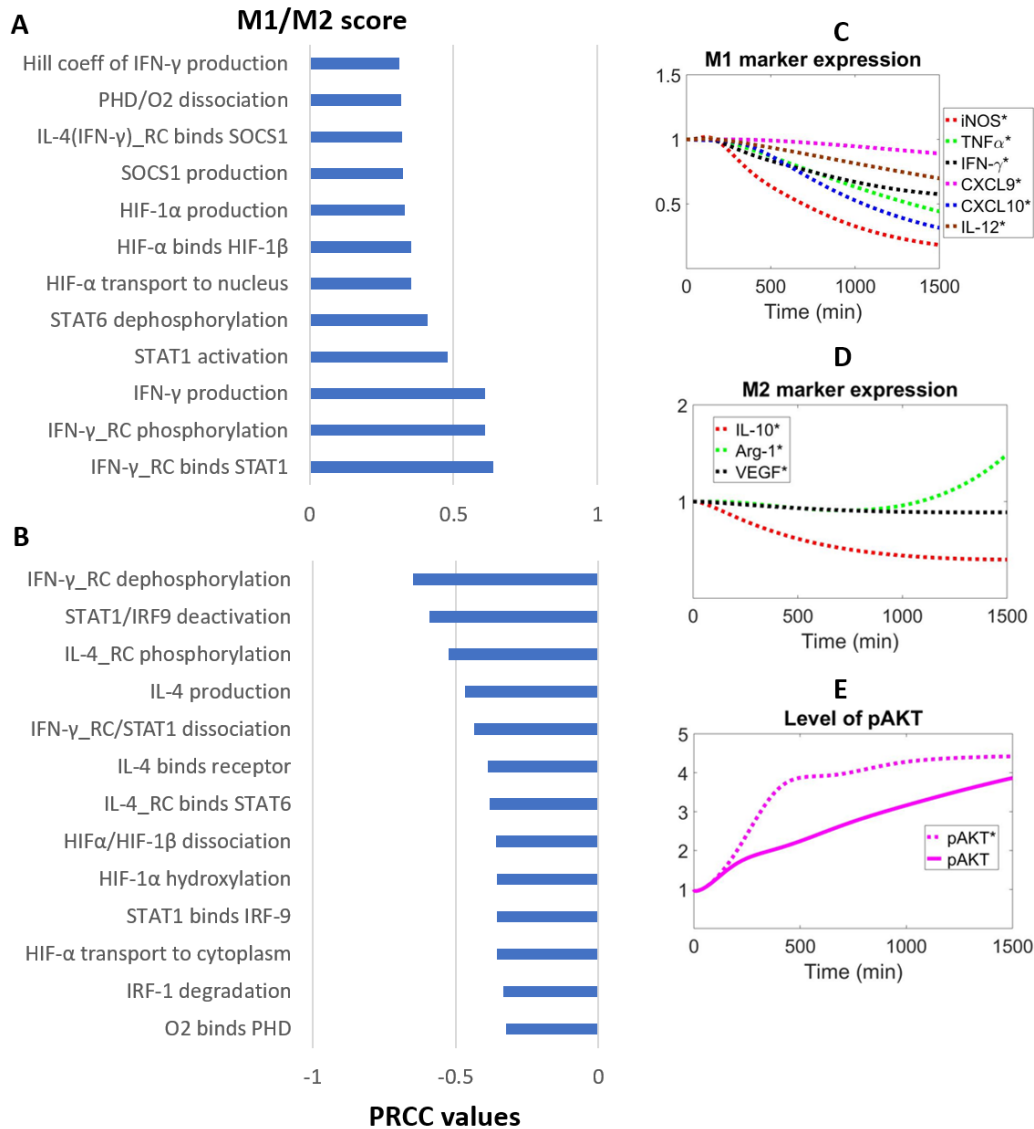

**Figure S7. Parameter sensitivities under high IL-4 production.** (A-B) Sensitivity indices (top 25 positive and negative PRCC values with  $p < 0.05$ ) of model parameters that control M1 and M2 marker expression in terms of the M1/M2 score under high IL-4 production (10x). In the parameter descriptions, ‘X\_RC’ means receptor complex formed by ligand X, receptor and JAK, ‘X/Y’ means complex formed by X and Y. (C-D) Simulated relative time-course expression (dashed lines) of M1 and M2 markers when macrophages are subjected to AKT inhibition (simulated as a 90% decrease in the AKT activation rate) under high IL-4 production. (E) Under the scenario of high IL-4 production, inhibition of STAT6 triggers increased activation of AKT as a compensatory mechanism to further upregulate M2 marker expression. (C-E) Marker expression levels are normalized to their respective  $t=0$  values (e.g. normal IL-4 production, unstimulated). All simulation results are protein levels (except CXCL10 is mRNA level). (A-B) More details about the parameters listed can be found in Table S1 using the labels (positive –  $ka_{37}$ ,  $kr_{70}$ ,  $kf_{17}$ ,  $k_{127}$ ,  $k_{61}$ ,  $kf_{64}$ ,  $kf_{63}$ ,  $k_{33}$ ,  $k_{45}$ ,  $k_{37}$ ,  $kf_{42}$ ,  $kf_{44}$ ; negative –  $kr_{42}$ ,  $k_{99}$ ,  $kf_8$ ,  $k_1$ ,  $kr_{44}$ ,  $kf_7$ ,  $kf_{13}$ ,  $kr_{64}$ ,  $k_{71}$ ,  $kf_{95}$ ,  $kr_{63}$ ,  $k_{78}$ ,  $kf_{70}$ ; order is from top to bottom as displayed).



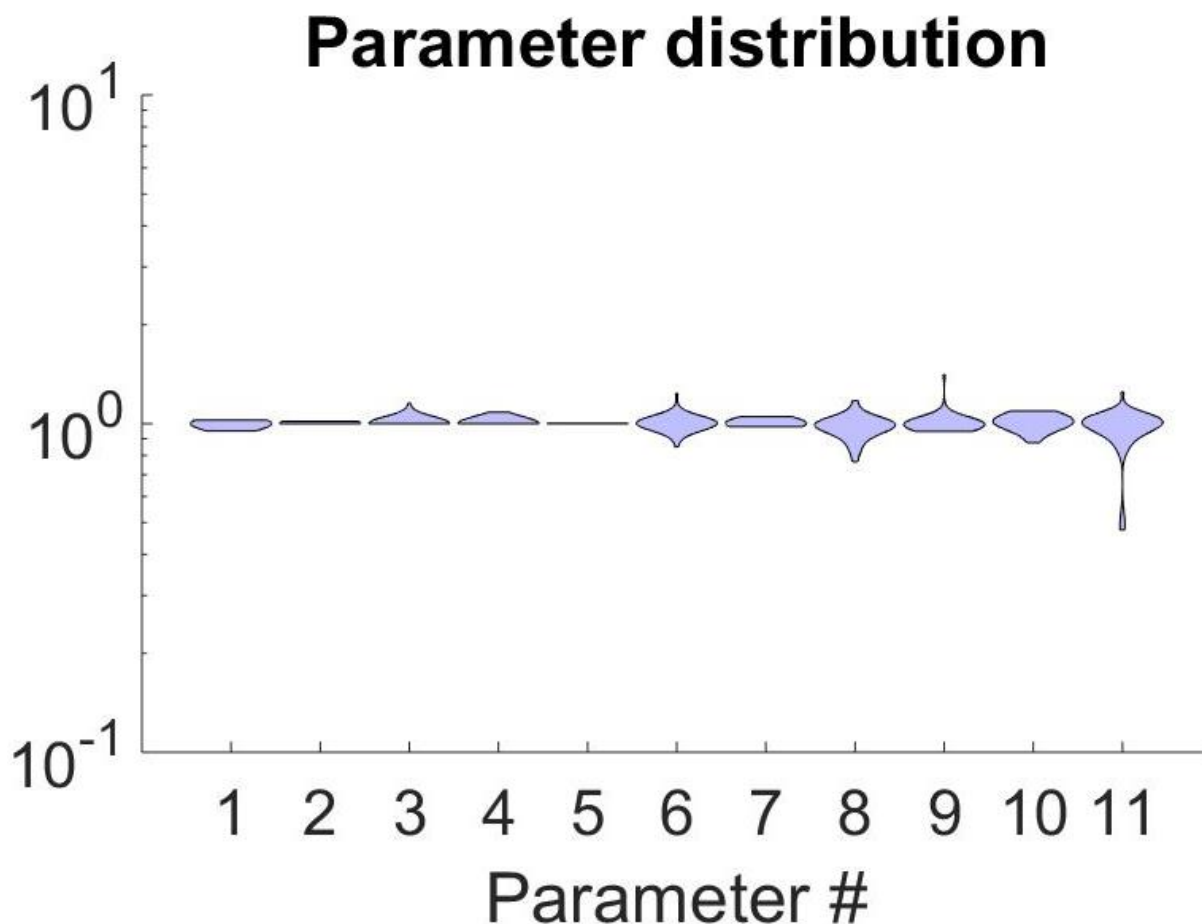

**Figure S8. Parameter distribution after bootstrapping.** Parameter estimate distributions (represented by violin plots) of the top 11 most sensitive parameters. The 11 parameters were re-estimated 50 times following the resampling procedures described in the Materials and Methods section (all parameter values are normalized to their respective original values for display, y-axis in log scale). During bootstrapping, parameter values are allowed to vary from 0.1x to 10x (of their original values). Parameter descriptions – #1. IFN- $\gamma$  receptor dephosphorylation rate; 2. forward binding rate of activated IFN- $\gamma$  receptor complex with STAT1; 3. deactivation rate of STAT1/IRF9 complex in nucleus; 4. IFN- $\gamma$  receptor phosphorylation rate; 5. reverse binding (e.g. dissociation) rate of activated IFN- $\gamma$  receptor complex with STAT1; 6. forward binding rate of IL-4 (or IFN- $\gamma$ ) receptor complex with SOCS1; 7. dephosphorylation rate of STAT6; 8. degradation rate of SOCS1/3-bound IL-4 (or IFN- $\gamma$ ) receptor complex; 9. rate of IL-4 receptor phosphorylation; 10. STAT1 activation rate; 11. forward binding rate of IFN- $\gamma$  receptor complex with SOCS3. The 11 parameters are chosen based on the overall ranking of their absolute PRCC values (from high to low) derived from the sensitivity analysis in three scenarios (IL-4 stimulation, IFN- $\gamma$  stimulation, and hypoxia).

| No.   | Reaction descriptions                                                     | Reaction flux details ( $v=$ )                                                | Parameter values                                               | Refs.       |
|-------|---------------------------------------------------------------------------|-------------------------------------------------------------------------------|----------------------------------------------------------------|-------------|
| $v1$  | IL-4 production                                                           | $k1$                                                                          | $k1=0.2 \text{ min}^{-1}$                                      | Fitted      |
| $v2$  | IL-4R production                                                          | $k2$                                                                          | $k2=0.16 \text{ min}^{-1}$                                     | Fitted      |
| $v3$  | IL-4R constitutive degradation                                            | $k3*[IL4R]$                                                                   | $k3=0.007 \text{ min}^{-1}$                                    | Fitted      |
| $v4$  | JAK production                                                            | $k4$                                                                          | $k4=50 \text{ min}^{-1}$                                       | Fitted      |
| $v5$  | JAK constitutive degradation                                              | $k5*[JAK]$                                                                    | $k5=0.0005 \text{ min}^{-1}$                                   | (27)        |
| $v6$  | IL-4R pre-associates with JAK                                             | $kf6*[JAK]*[IL4R]-$<br>$kr6*[IL4R/JAK]$                                       | $kf6=4e-6 \text{ min}^{-1}$ ,<br>$kr6=0.0018 \text{ min}^{-1}$ | Fitted      |
| $v7$  | IL-4 binds receptor                                                       | $kf7*[IL4]*[IL4R/JAK]-$<br>$kr7*[IL4/R/JAK]$                                  | $kf7=2e-7 \text{ min}^{-1}$ ,<br>$kr7=0.01 \text{ min}^{-1}$   | (28)        |
| $v8$  | IL-4 receptor complex phosphorylation                                     | $kf8*[IL4/R/JAK]-$<br>$kr8*[pIL4/R/JAK]$                                      | $kf8=0.6 \text{ min}^{-1}$ ,<br>$kr8=0.1 \text{ min}^{-1}$     | Fitted      |
| $v9$  | Internalization of phosphorylated IL-4 receptor complex                   | $k9*[pIL4/R/JAK]$                                                             | $k9=0.2 \text{ min}^{-1}$                                      | Fitted      |
| $v10$ | Shuttling of IL-4 receptor complex to lysosomes                           | $k10*[pIL4/R/JAK\_i]$                                                         | $k10=1 \text{ min}^{-1}$                                       | Fitted      |
| $v11$ | Degradation of IL-4 and IL-4R in lysosomes                                | $k11*[IL4/R\_lyso]$                                                           | $k11=0.3 \text{ min}^{-1}$                                     | Fitted      |
| $v12$ | Recycling of IL-4R                                                        | $k12*[IL4/R\_lyso]$                                                           | $k12=1 \text{ min}^{-1}$                                       | Fitted      |
| $v13$ | Binding of STAT6 with ligand-activated IL-4 receptor complex              | $kf13*[STAT6]*[pIL4/R/JAK\_i]-$<br>$kr13*[pIL4/R/JAK/STAT6]$                  | $kf13=0.1 \text{ min}^{-1}$ ,<br>$kr13=10 \text{ min}^{-1}$    | Fitted      |
| $v14$ | Activation of STAT6 by phosphorylation                                    | $k14*[pIL4/R/JAK/STAT6]$                                                      | $k14=8 \text{ min}^{-1}$                                       | Fitted      |
| $v15$ | Phosphorylation of AKT                                                    | $k15*[AKT]*(1-[PTEN]/([PTEN]+ka15))*$<br>$([pIL4/R/JAK]/([pIL4/R/JAK]+kb15))$ | $k15=1.16 \text{ min}^{-1}$ ,<br>$ka15=5000$ ,<br>$kb15=4$     | Fitted      |
| $v16$ | AKT dephosphorylation                                                     | $k16*[pAKT]$                                                                  | $k16=0.015 \text{ min}^{-1}$                                   | (29)        |
| $v17$ | Internalized IL-4 receptor complex binds SOCS1                            | $kf17*[pIL4/R/JAK\_i]*[SOCS1]-$<br>$kr17*[IL4/R/JAK/SOCS1\_i]$                | $kf17=0.008 \text{ min}^{-1}$ ,<br>$kr17=0.2 \text{ min}^{-1}$ | Fitted      |
| $v18$ | SOCS1 inhibits IL-4 signaling and shuttles IL-4 and receptor to lysosomes | $k10*[IL4/R/JAK/SOCS1\_i]$                                                    |                                                                | *           |
| $v19$ | SOCS1 sequesters JAK from the IL-4 receptor complex                       | $k19*[IL4/R/JAK/SOCS1\_i]$                                                    | $k19=0.03 \text{ min}^{-1}$                                    | Fitted      |
| $v20$ | Shuttling of internalized IL-4 and receptor to lysosomes                  | $k10*[IL4/R]$                                                                 |                                                                | *           |
| $v21$ | SOCS1 targets JAK for degradation                                         | $k21*[SOCS1/JAK]$                                                             | $k21=0.1 \text{ min}^{-1}$                                     | Fitted      |
| $v22$ | Internalized IL-4 and receptor associate with JAK to reactivate signaling | $kf6*[IL4/R]*[JAK]-$<br>$kr6*[pIL4/R/JAK\_i]$                                 |                                                                | *           |
| $v23$ | Internalized IL-4 receptor complex binds SOCS3                            | $kf23*[pIL4/R/JAK\_i]*[SOCS3]-$<br>$kr17*[IL4/R/JAK/SOCS3\_i]$                | $kf23=0.0004 \text{ min}^{-1}$                                 | Fitted<br>* |

|     |                                                                           |                                                                                              |                                                              |              |
|-----|---------------------------------------------------------------------------|----------------------------------------------------------------------------------------------|--------------------------------------------------------------|--------------|
| v24 | SOCS3 inhibits IL-4 signaling and shuttles IL-4 and receptor to lysosomes | $k10*[IL4/R/JAK/SOCS3\_i]$                                                                   |                                                              | *            |
| v25 | SOCS3 sequesters JAK from the IL-4 receptor complex                       | $k19*[IL4/R/JAK/SOCS3\_i]$                                                                   |                                                              | *            |
| v26 | SOCS3 targets JAK for degradation                                         | $k26*[SOCS3/JAK]$                                                                            | $k26=0.01 \text{ min}^{-1}$                                  | Fitted       |
| v27 | Surface IL-4 receptor complex binds SOCS1                                 | $kf17*[IL4/R/JAK]*[SOCS1]-kr17*[IL4/R/JAK/SOCS1]$                                            |                                                              | *            |
| v28 | SOCS1-mediated shuttling of surface IL-4 and receptor to lysosomes        | $k28*[IL4/R/JAK/SOCS1]$                                                                      | $k28=0.1 \text{ min}^{-1}$                                   | Fitted       |
| v29 | Surface IL-4 receptor complex binds SOCS3                                 | $kf23*[IL4/R/JAK]*[SOCS3]-kr17*[IL4/R/JAK/SOCS3]$                                            |                                                              | *            |
| v30 | SOCS3-mediated shuttling of surface IL-4 and receptor to lysosomes        | $k28*[IL4/R/JAK/SOCS3]$                                                                      |                                                              | *            |
| v31 | pSTAT6 dimerization                                                       | $kf31*[pSTAT6]*[pSTAT6]-kr31*[pSTAT6D]$                                                      | $kf31=0.002 \text{ min}^{-1}$ ,<br>$kr31=1 \text{ min}^{-1}$ | Fitted       |
| v32 | Activated STAT6 dimer transports to nucleus                               | $k32*[pSTAT6D]$                                                                              | $k32=0.4 \text{ min}^{-1}$                                   | Fitted       |
| v33 | Dephosphorylation of nuclear STAT6 dimer                                  | $k33*[pSTAT6D\_n]$                                                                           | $k33=0.01 \text{ min}^{-1}$                                  | (30)         |
| v34 | Dissociation of STAT6 dimer in nucleus                                    | $kr31*[STAT6D\_n]$                                                                           |                                                              | *            |
| v35 | Nuclear export of STAT6                                                   | $k35*[STAT6\_n]$                                                                             | $k35=0.05 \text{ min}^{-1}$                                  | (31)         |
| v36 | Dephosphorylation of STAT6                                                | $k33*[pSTAT6]$                                                                               |                                                              | *            |
| v37 | IFN- $\gamma$ production                                                  | $k37*([HIF1\alpha/\beta\_n]+0.2*[HIF2\alpha/\beta\_n])*(1-[pSTAT6D\_n]/([pSTAT6D\_n]+ka37))$ | $k37=0.0288 \text{ min}^{-1}$ ,<br>$ka37=100$                | Fitted       |
| v38 | IFNGR production                                                          | $k38$                                                                                        | $k38=1.22 \text{ min}^{-1}$                                  | Fitted       |
| v39 | IFNGR constitutive degradation                                            | $k39*[IFNGR]$                                                                                | $k39=0.006 \text{ min}^{-1}$                                 | (32)         |
| v40 | IFNGR pre-associates with JAK                                             | $kf6*[IFNGR]*[JAK]-kr40*[IFNGR/JAK]$                                                         | $kr40=0.002 \text{ min}^{-1}$                                | Fitted<br>*  |
| v41 | IFN- $\gamma$ binds receptor                                              | $kf41*[IFN\gamma]*[IFNGR/JAK]-kr7*[IFN\gamma/R/JAK]$                                         | $kf41=1.6e-7 \text{ min}^{-1}$                               | (33,<br>34)* |
| v42 | IFN- $\gamma$ receptor complex phosphorylation                            | $kf42*[IFN\gamma/R/JAK]-kr42*[pIFN\gamma/R/JAK]$                                             | $kf42=3 \text{ min}^{-1}$ ,<br>$kr42=10 \text{ min}^{-1}$    | Fitted       |
| v43 | IFN- $\gamma$ receptor complex binds SOCS1                                | $kf17*[IFN\gamma/R/JAK]*[SOCS1]-kr17*[IFN\gamma/R/JAK/SOCS1]$                                |                                                              | *            |
| v44 | STAT1 binds ligand-activated IFN- $\gamma$ receptor complex               | $kf44*[STAT1]*[pIFN\gamma/R/JAK]-kr44*[pIFN\gamma/R/JAK/STAT1]$                              | $kf44=0.03 \text{ min}^{-1}$ ,<br>$kr44=3 \text{ min}^{-1}$  | Fitted       |
| v45 | STAT1 activation by phosphorylation                                       | $k45*[pIFN\gamma/R/JAK/STAT1]$                                                               | $k45=2 \text{ min}^{-1}$                                     | Fitted       |
| v46 | Shuttling of IFN- $\gamma$ receptor complex to lysosomes                  | $k46*[pIFN\gamma/R/JAK]$                                                                     | $k46=0.1 \text{ min}^{-1}$                                   | Fitted       |

|     |                                                                                             |                                                                                                                               |                                                                |                 |
|-----|---------------------------------------------------------------------------------------------|-------------------------------------------------------------------------------------------------------------------------------|----------------------------------------------------------------|-----------------|
| v47 | Degradation of IFN- $\gamma$ and IFNGR in lysosomes                                         | $k47*[IFN\gamma/R\_lyso]$                                                                                                     | $k47=1\text{ min}^{-1}$                                        | Fitted          |
| v48 | Recycling of IFNGR                                                                          | $k12*[IFN\gamma/R\_lyso]$                                                                                                     |                                                                | *               |
| v49 | SOCS1 inhibits IFN- $\gamma$ signaling and shuttles IFN- $\gamma$ and receptor to lysosomes | $k46*[IFN\gamma/R/JAK/SOCS1]$                                                                                                 |                                                                | *               |
| v50 | SOCS1 sequesters JAK from the IFN- $\gamma$ receptor complex                                | $k19*[IFN\gamma/R/JAK/SOCS1]$                                                                                                 |                                                                | *               |
| v51 | IFN- $\gamma$ and receptor bind JAK to reactivate signaling                                 | $kf6*[IFN\gamma/R]*[JAK]-kr40*[IFN\gamma/R/JAK],$                                                                             |                                                                | *               |
| v52 | IFN- $\gamma$ receptor complex binds SOCS3                                                  | $kf52*[IFN\gamma/R/JAK]*[SOCS3]-kr17*[IFN\gamma/R/JAK/SOCS3]$                                                                 | $kf52=0.004\text{ min}^{-1}$                                   | Fitted<br>*     |
| v53 | SOCS3 inhibits IFN- $\gamma$ signaling and shuttles IFN- $\gamma$ and receptor to lysosomes | $k46*[IFN\gamma/R/JAK/SOCS3]$                                                                                                 |                                                                | *               |
| v54 | SOCS3 sequesters JAK from the IFN- $\gamma$ receptor complex                                | $k19*[IFN\gamma/R/JAK/SOCS3]$                                                                                                 |                                                                | *               |
| v55 | pSTAT1 dimerization                                                                         | $kf55*[pSTAT1]*[pSTAT1]-kr31*[pSTAT1D]$                                                                                       | $kf55=0.1\text{ min}^{-1}$                                     | Fitted<br>*     |
| v56 | Activated STAT1 dimer transports to nucleus                                                 | $k56*[pSTAT1D]$                                                                                                               | $k56=1\text{ min}^{-1}$                                        | Fitted          |
| v57 | Dephosphorylation of nuclear STAT1 dimer                                                    | $k57*[pSTAT1D\_n]$                                                                                                            | $k57=0.03\text{ min}^{-1}$                                     | (35)            |
| v58 | Dissociation of STAT1 dimer in nucleus                                                      | $kr31*[STAT1D\_n]$                                                                                                            |                                                                | *               |
| v59 | Nuclear export of STAT1                                                                     | $k59*[STAT1\_n]$                                                                                                              | $k59=0.1\text{ min}^{-1}$                                      | Fitted          |
| v60 | Dephosphorylation of STAT1                                                                  | $k57*[pSTAT1]$                                                                                                                |                                                                | *               |
| v61 | HIF-1 $\alpha$ production is promoted by TNF $\alpha$ signaling and downregulated by miR-93 | $k61*([TNF\alpha]+ka61)*((1.4-[miR93])/([miR93]+kb61))$                                                                       | $k61=0.0187\text{ min}^{-1},$<br>$ka61=800,$<br>$kb61=1000$    | Fitted          |
| v62 | HIF-2 $\alpha$ production is promoted by PPAR $\gamma$                                      | $k62*([aPPARG]/([aPPARG]+ka62))$                                                                                              | $k62=178\text{ min}^{-1},$<br>$ka62=10000$                     | Fitted          |
| v63 | HIF-1 $\alpha$ transport to nucleus                                                         | $kf63*[HIF1\alpha]-kr63*[HIF1\alpha\_n]$                                                                                      | $kf63=0.005\text{ min}^{-1},$<br>$kr63=0.018\text{ min}^{-1}$  | (36)            |
| v64 | HIF-2 $\alpha$ transport to nucleus                                                         | $kf63*[HIF2\alpha]-kr63*[HIF2\alpha\_n]$                                                                                      |                                                                | *               |
| v65 | Nuclear HIF-1 $\alpha$ binds HIF-1 $\beta$                                                  | $kf64*[HIF1\alpha\_n]*[HIF1\beta\_n]-kr64*[HIF1\alpha/\beta\_n]$                                                              | $kf64=5e-7\text{ min}^{-1},$<br>$kr64=0.03\text{ min}^{-1}$    | Fitted;<br>(36) |
| v66 | Nuclear HIF-2 $\alpha$ binds HIF-1 $\beta$                                                  | $kf64*[HIF2\alpha\_n]*[HIF1\beta\_n]-kr64*[HIF2\alpha/\beta\_n]$                                                              |                                                                | *               |
| v67 | PHD production                                                                              | $k67*(0.0001+[HIF1\alpha/\beta\_n]^2/([HIF1\alpha/\beta\_n]^2+ka67))*[HIF2\alpha/\beta\_n]^2/([HIF2\alpha/\beta\_n]^2+kb67))$ | $k67=602\text{ min}^{-1},$<br>$ka67=32600,$<br>$kb67=25400$    | Fitted          |
| v68 | PHD degradation                                                                             | $k68*[PHD]$                                                                                                                   | $k68=0.0008\text{ min}^{-1}$                                   | (27)            |
| v69 | Itaconate influences PHD activation                                                         | $kf69*[PHD]*[Itaconate]-kr69*[aPHD]$                                                                                          | $kf69=8e-9\text{ min}^{-1},$<br>$kr69=0.07\text{ min}^{-1}$    | Fitted          |
| v70 | PHD binds oxygen                                                                            | $kf70*[aPHD]*[O_2]-kr70*[O_2/aPHD]$                                                                                           | $kf70=7.14e-9\text{ min}^{-1},$<br>$kr70=10.8\text{ min}^{-1}$ | Fitted;<br>(36) |
| v71 | HIF1 $\alpha$ hydroxylation                                                                 | $k71*[O_2/aPHD]*[HIF-1\alpha]$                                                                                                | $k71=1.33e-5\text{ min}^{-1}$                                  | Fitted          |

|     |                                                                                                       |                                                                                                            |                                                                |        |
|-----|-------------------------------------------------------------------------------------------------------|------------------------------------------------------------------------------------------------------------|----------------------------------------------------------------|--------|
| v72 | HIF1 $\alpha$ de-ubiquitination                                                                       | $k72*[HIF1\alpha\_OH]$                                                                                     | $k72=0.03\text{ min}^{-1}$                                     | Fitted |
| v73 | Degradation of hydroxylated HIF-1 $\alpha$                                                            | $k73*[HIF1\alpha\_OH]$                                                                                     | $k73=0.6\text{ min}^{-1}$                                      | Fitted |
| v74 | HIF2 $\alpha$ hydroxylation                                                                           | $k74*[O_2/aPHD]*[HIF-2\alpha]$                                                                             | $k74=5e-6\text{ min}^{-1}$                                     | Fitted |
| v75 | HIF2 $\alpha$ de-ubiquitination                                                                       | $k72*[HIF2\alpha\_OH]$                                                                                     |                                                                | *      |
| v76 | Degradation of hydroxylated HIF-2 $\alpha$                                                            | $k73*[HIF2\alpha\_OH]$                                                                                     |                                                                | *      |
| v77 | STAT1 and STAT6 regulate IRF-1 production                                                             | $k77*(([pSTAT1D\_n]+[pSTAT1D/IRF9\_n])/[pSTAT6D\_n])/(([pSTAT1D\_n]+[pSTAT1D/IRF9\_n])/[pSTAT6D\_n]+ka77)$ | $k77=106\text{ min}^{-1}$ ,<br>$ka77=50$                       | Fitted |
| v78 | IRF-1 degradation                                                                                     | $k78*[IRF1]$                                                                                               | $k78=0.022\text{ min}^{-1}$                                    | (37)   |
| v79 | IFN- $\gamma$ (through IRF-1) inhibits miR-3473 production                                            | $k79*(1-[IRF1]^2/([IRF1]^2+ka79))$                                                                         | $k79=14.8\text{ min}^{-1}$ ,<br>$ka79=40000$                   | Fitted |
| v80 | Degradation of miR-3473                                                                               | $k80*[miR3473]$                                                                                            | $k80=0.0012\text{ min}^{-1}$                                   | (38)   |
| v81 | miR-3473 binds PTEN mRNA                                                                              | $kf81*[miR3473]*[mPTEN]-kr81*[miR3473/mPTEN]$                                                              | $kf81=0.0001\text{ min}^{-1}$ ,<br>$kr81=0.06\text{ min}^{-1}$ | (39)   |
| v82 | Degradation of miR3473-bound PTEN mRNA                                                                | $k82*[miR3473/mPTEN]$                                                                                      | $k82=0.1\text{ min}^{-1}$                                      | Fitted |
| v83 | Production of PTEN mRNA                                                                               | $k83$                                                                                                      | $k83=0.64\text{ min}^{-1}$                                     | Fitted |
| v84 | PTEN translation                                                                                      | $k84*[mPTEN]$                                                                                              | $k84=2.32\text{ min}^{-1}$                                     | Fitted |
| v85 | PTEN degradation                                                                                      | $k85*[PTEN]$                                                                                               | $k85=0.0003\text{ min}^{-1}$                                   | (27)   |
| v86 | PTEN mRNA constitutive degradation                                                                    | $k86*[mPTEN]$                                                                                              | $k86=0.003\text{ min}^{-1}$                                    | (40)   |
| v87 | miR-93 production is downregulated by IFN- $\gamma$ (represented by STAT1) and TNF $\alpha$ signaling | $k87*(1-[TNF\alpha]*[pSTAT1D\_n]^2/([TNF\alpha]*[pSTAT1D\_n]^2+ka87))$                                     | $k87=6050\text{ min}^{-1}$ ,<br>$ka87=1000$                    | Fitted |
| v88 | miR-93 degradation                                                                                    | $k88*[miR93]$                                                                                              | $k88=0.0018\text{ min}^{-1}$                                   | (38)   |
| v89 | miR-93 binds IRF9 mRNA                                                                                | $kf81*[miR93]*[mIRF9]-kr81*[miR93/mIRF9]$                                                                  |                                                                | *      |
| v90 | Degradation of miR93-bound IRF9 mRNA                                                                  | $k82*[miR93/mIRF9]$                                                                                        |                                                                | *      |
| v91 | IRF9 mRNA production                                                                                  | $k91$                                                                                                      | $k91=0.5\text{ min}^{-1}$                                      | Fitted |
| v92 | IRF9 mRNA constitutive degradation                                                                    | $k86*[mIRF9]$                                                                                              |                                                                | *      |
| v93 | IRF9 translation                                                                                      | $k93*[mIRF9]$                                                                                              | $k93=1.18\text{ min}^{-1}$                                     | Fitted |
| v94 | IRF9 degradation                                                                                      | $k94*[IRF9]$                                                                                               | $k94=0.004\text{ min}^{-1}$                                    | Fitted |
| v95 | IRF9 binds activated STAT1 dimer in cytoplasm                                                         | $kf95*[IRF9]*[pSTAT1D]-kr95*[pSTAT1D/IRF9]$                                                                | $kf95=0.00013\text{ min}^{-1}$ ,<br>$kr95=1\text{ min}^{-1}$   | Fitted |
| v96 | Nuclear translocation of STAT1/IRF9 complex                                                           | $k96*[pSTAT1D/IRF9]$                                                                                       | $k96=0.1\text{ min}^{-1}$                                      | Fitted |
| v97 | IRF9 binds activated STAT1 dimer in nucleus                                                           | $kf95*[IRF9\_n]*[pSTAT1D\_n]-kr95*[pSTAT1D/IRF9\_n]$                                                       |                                                                | *      |
| v98 | IRF9 translocation to nucleus                                                                         | $k96*[IRF9]-kr98*[IRF9\_n]$                                                                                | $kr98=0.01\text{ min}^{-1}$                                    | Fitted |
| v99 | Deactivation of STAT1/IRF9 complex in nucleus                                                         | $k99*[pSTAT1D/IRF9\_n]$                                                                                    | $k99=0.4\text{ min}^{-1}$                                      | Fitted |

|             |                                                                                                                  |                                                                                                                                |                                                                                     |          |
|-------------|------------------------------------------------------------------------------------------------------------------|--------------------------------------------------------------------------------------------------------------------------------|-------------------------------------------------------------------------------------|----------|
| <i>v100</i> | IRF4 production regulated by STAT6 and AKT                                                                       | $k100*[pSTAT6D\_n]/([pSTAT6D\_n]+ka100)*[pAKT]/([pAKT]+kb100)$                                                                 | $k100=6840\text{ min}^{-1}$ ,<br>$ka100=30000$ ,<br>$kb100=20000$                   | Fitted   |
| <i>v101</i> | IRF4 degradation                                                                                                 | $k101*[IRF4]$                                                                                                                  | $k101=0.0002\text{ min}^{-1}$                                                       | (27)     |
| <i>v102</i> | STAT6 promotes PPAR $\gamma$ production                                                                          | $k102*[pSTAT6D\_n]/([pSTAT6D\_n]+ka102)$                                                                                       | $k102=107\text{ min}^{-1}$ ,<br>$ka102=1000$                                        | Fitted   |
| <i>v103</i> | AKT promotes PPAR $\gamma$ activation                                                                            | $k103*[PPARG]*[pAKT]/([pAKT]+ka103)$                                                                                           | $k103=50\text{ min}^{-1}$ ,<br>$ka103=10000$                                        | Fitted   |
| <i>v104</i> | PPAR $\gamma$ deactivation                                                                                       | $k104*[aPPARG]$                                                                                                                | $k104=50\text{ min}^{-1}$                                                           | Fitted   |
| <i>v105</i> | Degradation of activated PPAR $\gamma$                                                                           | $k105*[aPPARG]$                                                                                                                | $k105=0.0018\text{ min}^{-1}$                                                       | (41)     |
| <i>v106</i> | Degradation of PPAR $\gamma$                                                                                     | $k105*[PPARG]$                                                                                                                 |                                                                                     | *        |
| <i>v107</i> | IRF9 and IRF1 promotes IRG-1 production                                                                          | $k107*[IRF1]*([IRF9\_n]+[pSTAT1D/IRF9\_n])^2$                                                                                  | $k107=4.77\text{e-}12\text{ min}^{-1}$                                              | Fitted   |
| <i>v108</i> | IRG1 degradation                                                                                                 | $k108*[IRG1]$                                                                                                                  | $k108=6.2\text{e-}4\text{ min}^{-1}$                                                | (27)     |
| <i>v109</i> | IRG1 promotes itaconate production                                                                               | $k109*[IRG1]^2$                                                                                                                | $k109=0.025\text{ min}^{-1}$                                                        | Fitted   |
| <i>v110</i> | Itaconate degradation                                                                                            | $k110*[Itaconate]$                                                                                                             | $k110=0.005\text{ min}^{-1}$                                                        | Fitted   |
| <i>v111</i> | HIF1/2 and AKT induce VEGF production                                                                            | $k111*([HIF1\alpha/\beta\_n]*[HIF2\alpha/\beta\_n]+ka111)*([pAKT]+kb111)$                                                      | $k111=3\text{e-}9\text{ min}^{-1}$ ,<br>$ka111=29200$ ,<br>$kb111=42700$            | Fitted   |
| <i>v112</i> | Removal of secreted VEGF                                                                                         | $k112*[VEGF]$                                                                                                                  | $k112=0.001\text{ min}^{-1}$                                                        | Fitted   |
| <i>v113</i> | iNOS production is dependent on HIF1, IRF1 and type I IFN signaling (represented by IRF9)                        | $k113*(0.02+[HIF1\alpha/\beta\_n]/([HIF1\alpha/\beta\_n]+ka113))*([IRF1]/([IRF1]+kb113))*([IRF9T]+15000)$                      | $k113=0.036\text{ min}^{-1}$ ,<br>$ka113=4000$ ,<br>$kb113=9000$                    | Fitted   |
| <i>v114</i> | iNOS degradation                                                                                                 | $k114*[iNOS]$                                                                                                                  | $k114=0.006\text{ min}^{-1}$                                                        | (42)     |
| <i>v115</i> | ARG1 production is promoted by STAT6, IRF4 and HIFs while downregulated by TNF $\alpha$                          | $k115*([pSTAT6D\_n]*[IRF4]+ka115)*([HIF1\alpha/\beta\_n]+2*[HIF2\alpha/\beta\_n])^2*(1.2-[TNF\alpha]^2/([TNF\alpha]^2+kb115))$ | $k115=3.76\text{e-}9\text{ min}^{-1}$ ,<br>$ka115=1.2\text{e}7$ ,<br>$kb115=100000$ | Fitted   |
| <i>v116</i> | ARG1 degradation                                                                                                 | $k116*[ARG1]$                                                                                                                  | $k116=0.0006\text{ min}^{-1}$                                                       | (43, 44) |
| <i>v117</i> | IRF1 and type I IFNs (represented by IRF9) can induce TNF $\alpha$ production                                    | $k117*[IRF1]^2/([IRF1]^2+ka117)*(30000+[IRF9T])^2$                                                                             | $k117=7.2\text{e-}10\text{ min}^{-1}$ ,<br>$ka117=1.6\text{e}6$                     | Fitted   |
| <i>v118</i> | Removal of secreted TNF $\alpha$                                                                                 | $k118*[TNF\alpha]$                                                                                                             | $k118=0.0008\text{ min}^{-1}$                                                       | Fitted   |
| <i>v119</i> | IL-10 production is promoted by AKT, type I IFNs (represented by IRF9) and STAT3 (represented by secreted IL-10) | $k119*[pAKT]*(2000+[IL10])*([IRF9T]+15000)$                                                                                    | $k119=6.22\text{e-}13\text{ min}^{-1}$                                              | Fitted   |
| <i>v120</i> | Removal of secreted IL-10                                                                                        | $k120*[IL10]$                                                                                                                  | $k120=0.0015\text{ min}^{-1}$                                                       | Fitted   |
| <i>v121</i> | IRF1 promotes IL-12 production                                                                                   | $k121*[IRF1]^2$                                                                                                                | $k121=5\text{e-}8\text{ min}^{-1}$                                                  | Fitted   |
| <i>v122</i> | Removal of secreted IL-12                                                                                        | $k122*[IL12]$                                                                                                                  | $k122=0.00033\text{ min}^{-1}$                                                      | Fitted   |
| <i>v123</i> | STAT1 induces CXCL9 synthesis                                                                                    | $k123*[pSTAT1D\_n]^2$                                                                                                          | $k123=1.67\text{e-}6\text{ min}^{-1}$                                               | Fitted   |
| <i>v124</i> | Removal of secreted CXCL9                                                                                        | $k124*[CXCL9]$                                                                                                                 | $k124=0.0002\text{ min}^{-1}$                                                       | Fitted   |



|              |                                                   |                                                                            |                                                                 |        |
|--------------|---------------------------------------------------|----------------------------------------------------------------------------|-----------------------------------------------------------------|--------|
| <i>v</i> 125 | STAT1/IRF9 complex induces CXCL10 mRNA production | $k125*[pSTAT1D/IRF9\_n]^2$                                                 | $k125=1e-6\text{ min}^{-1}$                                     | Fitted |
| <i>v</i> 126 | CXCL10 mRNA degradation                           | $k126*[mCXCL10]$                                                           | $k126=0.0035\text{ min}^{-1}$                                   | (40)   |
| <i>v</i> 127 | STAT1 and STAT6 induce SOCS1 production           | $k127*[pSTAT1D\_n]/([pSTAT1D\_n]+ka127)*[pSTAT6D\_n]/([pSTAT6D\_n]+kb127)$ | $k127=13342\text{ min}^{-1}$ ,<br>$ka127=6000$ ,<br>$kb127=500$ | Fitted |
| <i>v</i> 128 | Degradation of SOCS1                              | $k128*[SOCS1]$                                                             | $k128=0.004\text{ min}^{-1}$                                    | (45)   |
| <i>v</i> 129 | STAT1 induces SOCS3 production                    | $k129*[pSTAT1D\_n]/([pSTAT1D\_n]+ka129)$                                   | $k129=6571\text{ min}^{-1}$ ,<br>$ka129=6000$                   | Fitted |
| <i>v</i> 130 | Degradation of SOCS3                              | $k130*[SOCS3]$                                                             | $k130=0.05\text{ min}^{-1}$                                     | Fitted |

**Table S1. Complete list of model reactions and parameter values.** Reactions are formulated mechanistically based on literature evidence (the labels *v*# here match with the labels in Figure S1 and Table S2). As shown in the last column, numerical values of model parameters (~140 in total) are either estimated from relevant published data (e.g. experimental measurements, prior models) or estimated computationally through whole-model optimization ('fitted'). Certain parameter values are shared by more than one reaction fluxes (marked by \* in the last column).

| Name of model node         | Initial condition (in # of molecules) | Equation (d[x]/dt=)                     | Initial condition Refs.             |
|----------------------------|---------------------------------------|-----------------------------------------|-------------------------------------|
| VEGF                       | 5223                                  | $v111-v112$                             | Estimated from (46)                 |
| IFN $\gamma$               | 358                                   | $v37-v41$                               | Estimated from (47)                 |
| IFNGR/JAK                  | 20376                                 | $v40-v41$                               | Total IFNGR estimated from (48, 49) |
| IFNGR                      | 106                                   | $-v40+v48$                              | Fitted                              |
| IFN $\gamma$ /R            | 1                                     | $v50+v54-v51$                           | Fitted                              |
| IFN $\gamma$ /R/JAK        | 0                                     | $v41-v42-v43+v51-v52$                   | Fitted                              |
| pIFN $\gamma$ /R/JAK       | 0                                     | $v42-v44$                               | Fitted                              |
| STAT1                      | 397262                                | $-v44+v59+v60$                          | Total STAT1 estimated from (49, 50) |
| pIFN $\gamma$ /R/JAK/STAT1 | 84                                    | $v44-v45$                               | Fitted                              |
| pSTAT1                     | 41                                    | $v45-v60-2*v55$                         | Fitted                              |
| pSTAT1D                    | 81                                    | $v55-v56-v95$                           | Fitted                              |
| pSTAT1D_n                  | 80                                    | $v56-v57-v97$                           | Fitted                              |
| STAT1D_n                   | 84                                    | $v57+v99-v58$                           | Fitted                              |
| STAT1_n                    | 1673                                  | $2*v58-v59$                             | Fitted                              |
| SOCS1                      | 3169                                  | $v127-v128-v17+v18+v21-v27+v28-v43+v49$ | Total SOCS1 estimated from (51)     |
| IFN $\gamma$ /R/JAK/SOCS1  | 9                                     | $v43-v49-v50$                           | Fitted                              |
| IFN $\gamma$ /R_lyso       | 1                                     | $v46-v47-v48+v49+v53$                   | Fitted                              |
| SOCS1/JAK                  | 3                                     | $v50+v19-v21$                           | Fitted                              |
| IRF9                       | 2674                                  | $v93-v94-v95-v98$                       | Total IRF9 estimated from (49)      |
| IRF9_n                     | 27001                                 | $v98-v97+v99$                           | Fitted                              |
| pSTAT1D/IRF9               | 26                                    | $v95-v96$                               | Fitted                              |
| pSTAT1D/IRF9_n             | 203                                   | $v96-v99+v97$                           | Fitted                              |
| SOCS3                      | 1735                                  | $v129-v130-v23+v24+v26-v29+v30-v52+v53$ | Total SOCS3 estimated from (51)     |
| IFN $\gamma$ /R/JAK/SOCS3  | 3                                     | $v52-v53-v54$                           | Fitted                              |
| SOCS3/JAK                  | 8                                     | $v54+v25-v26$                           | Fitted                              |
| IL4                        | 288                                   | $v1-v7$                                 | Estimated from (52)                 |
| IL4R                       | 16                                    | $v2-v6+v12$                             | Fitted                              |
| IL4/R                      | 0                                     | $v19+v25-v22$                           | Fitted                              |
| IL4R/JAK                   | 3478                                  | $v6-v7$                                 | Total IL4R estimated from (49)      |
| IL4/R/JAK                  | 0                                     | $v7-v8$                                 | Fitted                              |
| pIL4/R/JAK                 | 0                                     | $v8-v9$                                 | Fitted                              |
| pIL4/R/JAK_i               | 0                                     | $v9-v10-v13+v14-v17+v22-v23$            | Fitted                              |
| IL4/R/JAK/SOCS1_i          | 0                                     | $v17-v18-v19$                           | Fitted                              |

|                            |         |                                                    |                                         |
|----------------------------|---------|----------------------------------------------------|-----------------------------------------|
| IL4/R_lyso                 | 0       | $v10-v11-v12+v18+v20+v24+v28+v30$                  | Fitted                                  |
| IL4/R/JAK/SOCS3_i          | 0       | $v23-v24-v25$                                      | Fitted                                  |
| IL4/R/JAK/SOCS1            | 2       | $v27-v28$                                          | Fitted                                  |
| IL4/R/JAK/SOCS3            | 0       | $v29-v30$                                          | Fitted                                  |
| STAT6                      | 59874   | $v35+v36-v13$                                      | Total STAT6 estimated from (49, 51)     |
| pIL4/R/JAK/STAT6           | 0       | $v13-v14$                                          | Fitted                                  |
| pSTAT6                     | 26      | $v14-v36-2*v31$                                    | Fitted                                  |
| pSTAT6D                    | 1       | $v31-v32$                                          | Fitted                                  |
| pSTAT6D_n                  | 39      | $v32-v33$                                          | Fitted                                  |
| STAT6D_n                   | 0       | $v33-v34$                                          | Fitted                                  |
| STAT6_n                    | 16      | $2*v34-v35$                                        | Fitted                                  |
| PTEN                       | 64899   | $v84-v85$                                          | Estimated from (49)                     |
| IRF4                       | 16460   | $v100-v101$                                        | Estimated from (49)                     |
| IL10                       | 571     | $v119-v120$                                        | Estimated from (53)                     |
| JAK                        | 99297   | $v4-v5-v6+v10+v18-v22+v24+v28+v30-v40+v46+v49+v53$ | Total JAK estimated from (49)           |
| ARG1                       | 875428  | $v115-v116$                                        | Estimated from (49)                     |
| miR3473                    | 1180    | $v79-v80-v81+v82$                                  | Estimated from (54)                     |
| mPTEN                      | 8       | $v83-v86-v81$                                      | Total mPTEN estimated from (55)         |
| miR3473/mPTEN              | 6       | $v81-v82$                                          | Fitted                                  |
| iNOS                       | 538     | $v113-v114$                                        | Fitted                                  |
| HIF1 $\alpha$              | 640     | $v61-v63-v71+v72$                                  | Total HIF1 $\alpha$ estimated from (56) |
| HIF1 $\alpha$ _n           | 178     | $v63-v65$                                          | Fitted                                  |
| HIF1 $\alpha$ / $\beta$ _n | 44      | $v65$                                              | Fitted                                  |
| HIF1 $\alpha$ _OH          | 42      | $v71-v72-v73$                                      | Fitted                                  |
| HIF2 $\alpha$              | 878     | $v62-v64-v74+v75$                                  | Total HIF2 $\alpha$ estimated from (56) |
| HIF2 $\alpha$ _n           | 244     | $v64-v66$                                          | Fitted                                  |
| HIF2 $\alpha$ / $\beta$ _n | 61      | $v66$                                              | Fitted                                  |
| HIF2 $\alpha$ _OH          | 22      | $v74-v75-v76$                                      | Fitted                                  |
| HIF1 $\beta$ _n            | 14897   | $-v65-v66$                                         | Total HIF1 $\beta$ estimated from (49)  |
| PPARG                      | 1437    | $v102-v103+v104-v106$                              | Total PPARG estimated from (57)         |
| aPPARG                     | 782     | $v103-v104-v105$                                   | Fitted                                  |
| IRF1                       | 614     | $v77-v78$                                          | Estimated from (49)                     |
| PHD                        | 5470    | $v67-v68-v69$                                      | Total PHD estimated from (49)           |
| O <sub>2</sub>             | 1.204e8 | <i>Constant</i>                                    | Estimated from (56)                     |
| O <sub>2</sub> /aPHD       | 3088    | $v70-v71-v74$                                      | Fitted                                  |
| aPHD                       | 38846   | $v69-v70+v71+v74$                                  | Fitted                                  |

|                             |         |                                                             |                                 |
|-----------------------------|---------|-------------------------------------------------------------|---------------------------------|
| TNF $\alpha$                | 619     | $v117-v118$                                                 | Estimated from (58-60)          |
| CXCL9                       | 54      | $v123-v124$                                                 | Fitted                          |
| mIRF9                       | 9       | $v91-v92-v89$                                               | Total mIRF9 estimated from (61) |
| miR93/mIRF9                 | 5       | $v89-v90$                                                   | Fitted                          |
| miR93                       | 841     | $v87-v88-v89+v90$                                           | Fitted                          |
| IL12                        | 58      | $v121-v122$                                                 | Estimated from (62)             |
| mCXCL10                     | 12      | $v125-v126$                                                 | Estimated from (61)             |
| AKT                         | 198060  | $-v15+v16$                                                  | Total AKT estimated from (49)   |
| pAKT                        | 11942   | $v15-v16$                                                   | Fitted                          |
| IRG1                        | 3522    | $v107-v108$                                                 | Estimated from (49)             |
| Itaconate                   | 6.214e7 | $v109-v110$                                                 | Estimated from (63)             |
| IRF9T (repeated assignment) | 29904   | $[IRF9T]=[IRF9]+[IRF9\_n]+[pSTAT1D/IRF9]+[pSTAT1D/IRF9\_n]$ | Fitted                          |

**Table S2. Differential equations and initial conditions of all model nodes.** A summary of the model equations and initial conditions in terms of absolute copy numbers of all 80 model nodes (proteins, RNAs, complexes, etc.) derived from the 34 functionally unique species. The initial levels (and also the steady state levels) of 31 out of 34 unique species are estimated and calibrated with respect to literature data (using both direct measurements and indirect observations), and the model is simulated in control condition without external stimulation until equilibrium to obtain the initial levels (e.g. copy numbers) of all 80 model nodes. A cell volume of 1 pL is assumed when doing unit conversion calculations for O<sub>2</sub> and itaconate (64, 65). To reduce model complexity, it is assumed that transcription factors and enzymes in Hill-type reactions are not consumed, mRNAs are not consumed during translation, and oxygen level is constant during each simulation run.

| <i>Description of Data Used in Calibration</i>                                                                         | <i>PMIDs of Sources</i>                                    |
|------------------------------------------------------------------------------------------------------------------------|------------------------------------------------------------|
| <b>IFN-<math>\gamma</math> module (in response to IFN-<math>\gamma</math> treatments unless noted otherwise below)</b> |                                                            |
| Surface-bound IFN- $\gamma$                                                                                            | 2953810                                                    |
| Phosphorylation of JAK                                                                                                 | 12667213                                                   |
| Phosphorylation of STAT1                                                                                               | 16473883, 26882544, 26299368, 28280036, 10490990           |
| Expression of IRF-1                                                                                                    | 17293456, 18802049                                         |
| Expression of iNOS                                                                                                     | 18655171, 9667738                                          |
| TNF $\alpha$ secretion                                                                                                 | 8802049                                                    |
| IL-12 secretion                                                                                                        | 25950470                                                   |
| CXCL-9 secretion                                                                                                       | 25950470                                                   |
| CXCL-10 mRNA expression                                                                                                | 25918247                                                   |
| Expression of miR-3473b                                                                                                | 25092892                                                   |
| Itaconate expression                                                                                                   | 26829557                                                   |
| PTEN expression upon miR-3473b overexpression                                                                          | 25092892                                                   |
| HIF1 $\alpha$ expression upon IFN- $\gamma$ treatment and hypoxia                                                      | 20194441                                                   |
| SOCS1 mRNA expression                                                                                                  | 17093501                                                   |
| SOCS3 mRNA expression                                                                                                  | 17093501                                                   |
| HIF2 $\alpha$ expression upon IFN- $\gamma$ treatment and hypoxia                                                      | 20194441                                                   |
| <b>IL-4 module (in response to IL-4 treatments unless noted otherwise below)</b>                                       |                                                            |
| STAT6 phosphorylation                                                                                                  | 27731330, 17093501, 26894960, 26883801, 27464342, 25175012 |
| Phosphorylated STAT6 in nucleus                                                                                        | 23913966                                                   |
| IRF-4 expression                                                                                                       | 29871928, 23287596, 20580461                               |
| AKT activation                                                                                                         | 26894960, 27731330, 27507812                               |
| PPAR $\gamma$ expression                                                                                               | 29203644, 24385430                                         |
| Arg-1 expression                                                                                                       | 23287596, 27117406, 23913966                               |
| Arg-1 activity                                                                                                         | 22348056                                                   |
| IL-10 secretion                                                                                                        | 28903394, 21753147                                         |
| VEGF secretion                                                                                                         | 28842601                                                   |
| VEGF expression (intracellular)                                                                                        | 28903394                                                   |
| TNF $\alpha$ secretion                                                                                                 | 28903394, 21753147                                         |
| HIF2 $\alpha$ expression upon IL-4 treatment and hypoxia                                                               | 20194441                                                   |
| SOCS1 mRNA expression                                                                                                  | 17093501                                                   |
| HIF1 $\alpha$ expression upon IL-4 treatment and hypoxia                                                               | 20194441                                                   |
| <b>Hypoxia module (in response to hypoxia unless noted otherwise below)</b>                                            |                                                            |
| HIF1 $\alpha$ stabilization                                                                                            | 24301659, 16533170, 20644254, 19454749                     |
| HIF2 $\alpha$ stabilization                                                                                            | 16533170, 20644254, 19454749                               |
| iNOS expression                                                                                                        | 28211523                                                   |
| Arg-1 expression                                                                                                       | 28211523                                                   |

|                                                                |          |
|----------------------------------------------------------------|----------|
| TNF $\alpha$ secretion                                         | 22566835 |
| IFN- $\gamma$ secretion                                        | 19234213 |
| VEGF secretion                                                 | 17065555 |
| VEGF expression (intracellular)                                | 28903394 |
| miR-93 expression                                              | 28356443 |
| IFN- $\gamma$ secretion upon miR-93 overexpression and hypoxia | 28356443 |
| PHD2 expression                                                | 12912907 |
| IRF-1 expression                                               | 11313373 |
| IRF-9 mRNA expression                                          | 28356443 |
| IRG-1 mRNA expression                                          | 28356443 |
| IRG-1 mRNA expression upon miR-93 overexpression               | 28356443 |
| TNF $\alpha$ secretion upon miR-93 overexpression and hypoxia  | 28356443 |

**Table S3. Summary of literature sources used in model calibration.** Listed here are the descriptions and PMIDs of all the literature sources from which the model calibration datasets were extracted.



## **Protocol S1:** Additional information regarding model formulation and analysis

### **Model Formulation**

Macrophage polarization is a complex, dynamic multi-pathway process with numerous feedbacks and cross-talks, which also makes it a highly suitable topic for systems biology modeling. Given the many relevant pathways and the large number of mechanistic details that govern macrophage polarization, it makes sense to approach this problem in a stepwise manner (e.g. first build a “beginner model”, then gradually enrich the model with more pathways of high importance in disease contexts). After careful analysis of literature knowledge, we ended up choosing three pathways (IFN- $\gamma$ , IL-4, hypoxia) to model in the beginning step (as presented in this paper), since IFN- $\gamma$  and IL-4 are representative inducers of M1 and M2 phenotypes and many experimental studies have tried to elucidate their downstream signaling and gene regulation mechanisms (which provided a wealth of quantitative data that can be used to calibrate our “beginner model”), and also because that hypoxia is a key signature in the disease areas that we are interested in (namely peripheral arterial disease and cancer) while its direct impact on macrophage polarization and connections with other macrophage pathways have not been systematically characterized before.

### **Model Calibration**

During model calibration, values of some model parameters are derived directly from literature data and previous models (as shown in Table S1); for the remaining parameters with no literature reference, we put in tentative values first and then hand-tuned the entire model extensively (by adjusting parameter values and observing model response) until the model simulations achieved good visual agreements with all the respective calibration datasets (from the sources listed in Table S3) simultaneously. In the meantime, the initial conditions of “unique” species in the model have to stay within the allowed ranges (0.5x-2x of concentration values estimated from literature as listed in Table S2, except for total HIF-1 $\alpha$  and HIF-2 $\alpha$  which we set that their resting concentrations per cell should be less than a few nanomolar according to (56)). Then we performed preliminary sensitivity analysis (for three cases, IL-4 or IFN- $\gamma$  or hypoxia stimulation) and collectively identified 101 parameters that have statistically significant ( $p < 0.05$ ) PRCC values. Among the 101 parameters, 82 had no literature reference and global optimization using

*patternsearch* in MATLAB was then performed for those 82 parameter values (with 0.5x-2x as the allowed ranges) with respect to all the calibration datasets (along with the initial condition checks in every iteration) to generate the final parameter values. We rounded the final values to three significant digits for all parameters (as listed in Table S1).

For the initial condition checks, we simulated the model for 100000 minutes to obtain species endpoint values (and check if they are within appropriate ranges as described above) and use these endpoint values as new initial conditions to generate simulations and calculate squared errors with respect to the literature data in every iteration of *patternsearch* optimization. Since we selected this very long time span, in each iteration these new initial conditions obtained would represent a set of species equilibrium states (of macrophages under normoxia without externally added stimuli) that can be compared with quantitative literature data.

## **Model Sensitivity Analysis and Uncertainty Quantification**

For model sensitivity analysis, we used Latin Hypercube Sampling method with parameter ranges of 0.5x-2x to calculate the PRCC values (with  $p=0.05$  as the cutoff for statistical significance) based on the algorithm and code published in (66). The output of interest in PRCC calculations are “M1/M2 scores”, which are the multiplication of six M1 markers ( $[iNOS] \cdot [IFN\gamma] \cdot [TNF\alpha] \cdot [IL12] \cdot [CXCL9] \cdot [mCXCL10]$ ;  $[IFN\gamma]$  is removed when calculating PRCCs in scenarios of  $IFN\gamma$  stimulation) divided by the multiplication of three M2 markers ( $[ARG1] \cdot [VEGF] \cdot [IL10]$ ). For uncertainty quantification, each of the 50 re-sampled datasets has 229 individual datapoints that covered all the experimental conditions used in model calibration. For each datapoint, we assumed its value is within a distinct normal distribution with a mean and a standard deviation (whenever possible, the mean and standard deviations are calculated from the corresponding literature data that we gathered; for datapoints that only had one value and no repeat, we considered that single value as the mean and assumed that the standard deviation equals to 10% of that value). Then the 229 datapoint values in each re-sampled dataset were compiled in order by generating random numbers from the 229 normal distributions. The 50 re-sampled datasets were then fed into the optimization algorithm to obtain 50 sets of new parameter estimates (as described in Materials and Methods).

## 285     **References for Supporting Information**

- 286     1.        Majoros A, Platanitis E, Szappanos D, Cheon H, Vogl C, Shukla P, et al. Response to interferons  
287     and antibacterial innate immunity in the absence of tyrosine-phosphorylated STAT1. *EMBO Rep.*  
288     2016;17(3):367-82.
- 289     2.        Kim HS, Kim DC, Kim HM, Kwon HJ, Kwon SJ, Kang SJ, et al. STAT1 deficiency redirects IFN  
290     signalling toward suppression of TLR response through a feedback activation of STAT3. *Sci Rep.*  
291     2015;5:13414.
- 292     3.        Li X, Zhang Z, Li L, Gong W, Lazenby AJ, Swanson BJ, et al. Myeloid-derived cullin 3 promotes  
293     STAT3 phosphorylation by inhibiting OGT expression and protects against intestinal inflammation. *J Exp*  
294     *Med.* 2017;214(4):1093-109.
- 295     4.        Ting LM, Kim AC, Cattamanchi A, Ernst JD. Mycobacterium tuberculosis inhibits IFN-gamma  
296     transcriptional responses without inhibiting activation of STAT1. *J Immunol.* 1999;163(7):3898-906.
- 297     5.        Dickensheets H, Vazquez N, Sheikh F, Gingras S, Murray PJ, Ryan JJ, et al. Suppressor of cytokine  
298     signaling-1 is an IL-4-inducible gene in macrophages and feedback inhibits IL-4 signaling. *Genes Immun.*  
299     2007;8(1):21-7.
- 300     6.        Vila-del Sol V, Punzon C, Fresno M. IFN-gamma-induced TNF-alpha expression is regulated by  
301     interferon regulatory factors 1 and 8 in mouse macrophages. *J Immunol.* 2008;181(7):4461-70.
- 302     7.        Ohata T, Fukuda K, Murakami A, Ohigashi H, Sugimura T, Wakabayashi K. Inhibition by 1'-  
303     acetoxychavicol acetate of lipopolysaccharide- and interferon-gamma-induced nitric oxide production  
304     through suppression of inducible nitric oxide synthase gene expression in RAW264 cells. *Carcinogenesis.*  
305     1998;19(6):1007-12.
- 306     8.        Wu C, Xue Y, Wang P, Lin L, Liu Q, Li N, et al. IFN-gamma primes macrophage activation by  
307     increasing phosphatase and tensin homolog via downregulation of miR-3473b. *J Immunol.*  
308     2014;193(6):3036-44.
- 309     9.        Takeda N, O'Dea EL, Doedens A, Kim JW, Weidemann A, Stockmann C, et al. Differential  
310     activation and antagonistic function of HIF- $\alpha$  isoforms in macrophages are essential for NO  
311     homeostasis. *Genes Dev.* 2010;24(5):491-501.
- 312     10.      Wormald S, Zhang JG, Krebs DL, Mielke LA, Silver J, Alexander WS, et al. The comparative roles  
313     of suppressor of cytokine signaling-1 and -3 in the inhibition and desensitization of cytokine signaling. *J*  
314     *Biol Chem.* 2006;281(16):11135-43.
- 315     11.      Covarrubias AJ, Aksoylar HI, Yu J, Snyder NW, Worth AJ, Iyer SS, et al. Akt-mTORC1 signaling  
316     regulates Acly to integrate metabolic input to control of macrophage activation. *Elife.* 2016;5.
- 317     12.      Yao Y, Wang Y, Zhang Z, He L, Zhu J, Zhang M, et al. Chop Deficiency Protects Mice Against  
318     Bleomycin-induced Pulmonary Fibrosis by Attenuating M2 Macrophage Production. *Mol Ther.*  
319     2016;24(5):915-25.
- 320     13.      Rex J, Albrecht U, Ehling C, Thomas M, Zanger UM, Sawodny O, et al. Model-Based  
321     Characterization of Inflammatory Gene Expression Patterns of Activated Macrophages. *PLoS Comput*  
322     *Biol.* 2016;12(7):e1005018.
- 323     14.      Zhu L, Yang T, Li L, Sun L, Hou Y, Hu X, et al. TSC1 controls macrophage polarization to prevent  
324     inflammatory disease. *Nat Commun.* 2014;5:4696.
- 325     15.      Sheldon KE, Shandilya H, Kepka-Lenhart D, Poljakovic M, Ghosh A, Morris SM, Jr. Shaping the  
326     murine macrophage phenotype: IL-4 and cyclic AMP synergistically activate the arginase I promoter. *J*  
327     *Immunol.* 2013;191(5):2290-8.
- 328     16.      El Chartouni C, Schwarzfischer L, Rehli M. Interleukin-4 induced interferon regulatory factor (Irf)  
329     4 participates in the regulation of alternative macrophage priming. *Immunobiology.* 2010;215(9-10):821-  
330     5.
- 331     17.      Kimura T, Nada S, Takegahara N, Okuno T, Nojima S, Kang S, et al. Polarization of M2  
332     macrophages requires Lamtor1 that integrates cytokine and amino-acid signals. *Nat Commun.*  
333     2016;7:13130.

18. McCormick SM, Gowda N, Fang JX, Heller NM. Suppressor of Cytokine Signaling (SOCS)1 Regulates Interleukin-4 (IL-4)-activated Insulin Receptor Substrate (IRS)-2 Tyrosine Phosphorylation in Monocytes and Macrophages via the Proteasome. *J Biol Chem.* 2016;291(39):20574-87.
19. Zanin RF, Braganhol E, Bergamin LS, Campesato LF, Filho AZ, Moreira JC, et al. Differential macrophage activation alters the expression profile of NTPDase and ecto-5'-nucleotidase. *PLoS One.* 2012;7(2):e31205.
20. Zhang W, Xu W, Xiong S. Macrophage differentiation and polarization via phosphatidylinositol 3-kinase/Akt-ERK signaling pathway conferred by serum amyloid P component. *J Immunol.* 2011;187(4):1764-77.
21. Lee C, Bae SS, Joo H, Bae H. Melittin suppresses tumor progression by regulating tumor-associated macrophages in a Lewis lung carcinoma mouse model. *Oncotarget.* 2017;8(33):54951-65.
22. Fang HY, Hughes R, Murdoch C, Coffelt SB, Biswas SK, Harris AL, et al. Hypoxia-inducible factors 1 and 2 are important transcriptional effectors in primary macrophages experiencing hypoxia. *Blood.* 2009;114(4):844-59.
23. Berra E, Benizri E, Ginouves A, Volmat V, Roux D, Pouyssegur J. HIF prolyl-hydroxylase 2 is the key oxygen sensor setting low steady-state levels of HIF-1alpha in normoxia. *EMBO J.* 2003;22(16):4082-90.
24. Carta L, Pastorino S, Melillo G, Bosco MC, Massazza S, Varesio L. Engineering of macrophages to produce IFN-gamma in response to hypoxia. *J Immunol.* 2001;166(9):5374-80.
25. Mei Y, Thompson MD, Shiraishi Y, Cohen RA, Tong X. Sarcoplasmic/endoplasmic reticulum Ca<sup>2+</sup>-ATPase C674 promotes ischemia- and hypoxia-induced angiogenesis via coordinated endothelial cell and macrophage function. *J Mol Cell Cardiol.* 2014;76:275-82.
26. Ganta VC, Choi MH, Kutateladze A, Fox TE, Farber CR, Annex BH. A MicroRNA93-Interferon Regulatory Factor-9-Immunoresponsive Gene-1-Itaconic Acid Pathway Modulates M2-Like Macrophage Polarization to Revascularize Ischemic Muscle. *Circulation.* 2017;135(24):2403-25.
27. Cambridge SB, Gnad F, Nguyen C, Bermejo JL, Kruger M, Mann M. Systems-wide proteomic analysis in mammalian cells reveals conserved, functional protein turnover. *J Proteome Res.* 2011;10(12):5275-84.
28. Bankaitis KV, Fingleton B. Targeting IL4/IL4R for the treatment of epithelial cancer metastasis. *Clin Exp Metastasis.* 2015;32(8):847-56.
29. Gao T, Furnari F, Newton AC. PHLPP: a phosphatase that directly dephosphorylates Akt, promotes apoptosis, and suppresses tumor growth. *Mol Cell.* 2005;18(1):13-24.
30. Hanson EM, Dickensheets H, Qu CK, Donnelly RP, Keegan AD. Regulation of the dephosphorylation of Stat6. Participation of Tyr-713 in the interleukin-4 receptor alpha, the tyrosine phosphatase SHP-1, and the proteasome. *J Biol Chem.* 2003;278(6):3903-11.
31. Chen HC, Reich NC. Live cell imaging reveals continuous STAT6 nuclear trafficking. *J Immunol.* 2010;185(1):64-70.
32. Londino JD, Gulick DL, Lear TB, Suber TL, Weathington NM, Masa LS, et al. Post-translational modification of the interferon-gamma receptor alters its stability and signaling. *Biochem J.* 2017;474(20):3543-57.
33. Ping Z, Qi J, Sun Y, Lu G, Shi Y, Wang X, et al. Crystal structure of the interferon gamma receptor alpha chain from chicken reveals an undetected extra helix compared with the human counterparts. *J Interferon Cytokine Res.* 2014;34(1):41-51.
34. Nickoloff BJ. Binding of 125I-gamma interferon to cultured human keratinocytes. *J Invest Dermatol.* 1987;89(2):132-5.
35. Zhu W, Mustelin T, David M. Arginine methylation of STAT1 regulates its dephosphorylation by T cell protein tyrosine phosphatase. *J Biol Chem.* 2002;277(39):35787-90.
36. Zhao C, Isenberg JS, Popel AS. Transcriptional and Post-Transcriptional Regulation of Thrombospondin-1 Expression: A Computational Model. *PLoS Comput Biol.* 2017;13(1):e1005272.

37. Eckhardt I, Weigert A, Fulda S. Identification of IRF1 as critical dual regulator of Smac mimetic-induced apoptosis and inflammatory cytokine response. *Cell Death Dis.* 2014;5:e1562.

38. Marzi MJ, Ghini F, Cerruti B, de Pretis S, Bonetti P, Giacomelli C, et al. Degradation dynamics of microRNAs revealed by a novel pulse-chase approach. *Genome Res.* 2016;26(4):554-65.

39. Wang X, Li Y, Xu X, Wang YH. Toward a system-level understanding of microRNA pathway via mathematical modeling. *Biosystems.* 2010;100(1):31-8.

40. Sharova LV, Sharov AA, Nedorezov T, Piao Y, Shaik N, Ko MS. Database for mRNA half-life of 19 977 genes obtained by DNA microarray analysis of pluripotent and differentiating mouse embryonic stem cells. *DNA Res.* 2009;16(1):45-58.

41. Waite KJ, Floyd ZE, Arbour-Reily P, Stephens JM. Interferon-gamma-induced regulation of peroxisome proliferator-activated receptor gamma and STATs in adipocytes. *J Biol Chem.* 2001;276(10):7062-8.

42. Kolodziejski PJ, Koo JS, Eissa NT. Regulation of inducible nitric oxide synthase by rapid cellular turnover and cotranslational down-regulation by dimerization inhibitors. *Proc Natl Acad Sci U S A.* 2004;101(52):18141-6.

43. Setty BA, Jin Y, Houghton PJ, Yeager ND, Gross TG, Nelin LD. Hypoxic Proliferation of Osteosarcoma Cells Depends on Arginase II. *Cell Physiol Biochem.* 2016;39(2):802-13.

44. Schimke RT. The Importance of Both Synthesis and Degradation in the Control of Arginase Levels in Rat Liver. *J Biol Chem.* 1964;239:3808-17.

45. Zimmer J, Weitnauer M, Boutin S, Kublbeck G, Thiele S, Walker P, et al. Nuclear Localization of Suppressor of Cytokine Signaling-1 Regulates Local Immunity in the Lung. *Front Immunol.* 2016;7:514.

46. Eubank TD, Roda JM, Liu H, O'Neil T, Marsh CB. Opposing roles for HIF-1alpha and HIF-2alpha in the regulation of angiogenesis by mononuclear phagocytes. *Blood.* 2011;117(1):323-32.

47. Yu Y, Cui Y, Zhao Y, Liu S, Song G, Jiao P, et al. The binding capability of plasma phospholipid transfer protein, but not HDL pool size, is critical to repress LPS induced inflammation. *Sci Rep.* 2016;6:20845.

48. Crouse JA, Mitchell WM. Interferon-gamma receptor: mRNA half-life, receptor mass, and abundance on A431 human epidermoid carcinoma cells. *J Interferon Res.* 1992;12(1):23-5.

49. Azimifar SB, Nagaraj N, Cox J, Mann M. Cell-type-resolved quantitative proteomics of murine liver. *Cell Metab.* 2014;20(6):1076-87.

50. Precious BL, Carlos TS, Goodbourn S, Randall RE. Catalytic turnover of STAT1 allows PIV5 to dismantle the interferon-induced anti-viral state of cells. *Virology.* 2007;368(1):114-21.

51. Brenes A, Afzal V, Kent R, Lamond AI. The Encyclopedia of Proteome Dynamics: a big data ecosystem for (prote)omics. *Nucleic Acids Res.* 2018;46(D1):D1202-D9.

52. Mukherjee S, Chen LY, Papadimos TJ, Huang S, Zuraw BL, Pan ZK. Lipopolysaccharide-driven Th2 cytokine production in macrophages is regulated by both MyD88 and TRAM. *J Biol Chem.* 2009;284(43):29391-8.

53. Yang HL, Zhou WJ, Chang KK, Mei J, Huang LQ, Wang MY, et al. The crosstalk between endometrial stromal cells and macrophages impairs cytotoxicity of NK cells in endometriosis by secreting IL-10 and TGF-beta. *Reproduction.* 2017;154(6):815-25.

54. Bissels U, Wild S, Tomiuk S, Holste A, Hafner M, Tuschl T, et al. Absolute quantification of microRNAs by using a universal reference. *RNA.* 2009;15(12):2375-84.

55. Schwanhaussner B, Busse D, Li N, Dittmar G, Schuchhardt J, Wolf J, et al. Global quantification of mammalian gene expression control. *Nature.* 2011;473(7347):337-42.

56. Tuckerman JR, Zhao Y, Hewitson KS, Tian YM, Pugh CW, Ratcliffe PJ, et al. Determination and comparison of specific activity of the HIF-prolyl hydroxylases. *FEBS Lett.* 2004;576(1-2):145-50.

57. Simicevic J, Schmid AW, Gilardoni PA, Zoller B, Raghav SK, Krier I, et al. Absolute quantification of transcription factors during cellular differentiation using multiplexed targeted proteomics. *Nat Methods.* 2013;10(6):570-6.

58. Xaus J, Comalada M, Valledor AF, Lloberas J, Lopez-Soriano F, Argiles JM, et al. LPS induces apoptosis in macrophages mostly through the autocrine production of TNF-alpha. *Blood*. 2000;95(12):3823-31.
59. Barbera-Cremades M, Gomez AI, Baroja-Mazo A, Martinez-Alarcon L, Martinez CM, de Torre-Minguela C, et al. P2X7 Receptor Induces Tumor Necrosis Factor-alpha Converting Enzyme Activation and Release to Boost TNF-alpha Production. *Front Immunol*. 2017;8:862.
60. Cudejko C, Wouters K, Fuentes L, Hannou SA, Paquet C, Bantubungi K, et al. p16INK4a deficiency promotes IL-4-induced polarization and inhibits proinflammatory signaling in macrophages. *Blood*. 2011;118(9):2556-66.
61. Marinov GK, Williams BA, McCue K, Schroth GP, Gertz J, Myers RM, et al. From single-cell to cell-pool transcriptomes: stochasticity in gene expression and RNA splicing. *Genome Res*. 2014;24(3):496-510.
62. Su Z, Yang R, Zhang W, Xu L, Zhong Y, Yin Y, et al. The synergistic interaction between the calcineurin B subunit and IFN-gamma enhances macrophage antitumor activity. *Cell Death Dis*. 2015;6:e1740.
63. Michelucci A, Cordes T, Ghelfi J, Pailot A, Reiling N, Goldmann O, et al. Immune-responsive gene 1 protein links metabolism to immunity by catalyzing itaconic acid production. *Proc Natl Acad Sci U S A*. 2013;110(19):7820-5.
64. Krombach F, Munzing S, Allmeling AM, Gerlach JT, Behr J, Dorger M. Cell size of alveolar macrophages: an interspecies comparison. *Environ Health Perspect*. 1997;105 Suppl 5:1261-3.
65. Swanson JA, Lee M, Knapp PE. Cellular dimensions affecting the nucleocytoplasmic volume ratio. *J Cell Biol*. 1991;115(4):941-8.
66. Marino S, Hogue IB, Ray CJ, Kirschner DE. A methodology for performing global uncertainty and sensitivity analysis in systems biology. *J Theor Biol*. 2008;254(1):178-96.
