# Supplementary material for: A mechanistic integrative computational model of macrophage polarization: Implications in human pathophysiology
Source: PLOS journal article supplement (doi:10.1371/journal.pcbi.1007468), 2019-11-18
Supplement: S7 (10.1371/journal.pcbi.1007468.s007) [file journal.pcbi.1007468.s007]

**Figure S6**

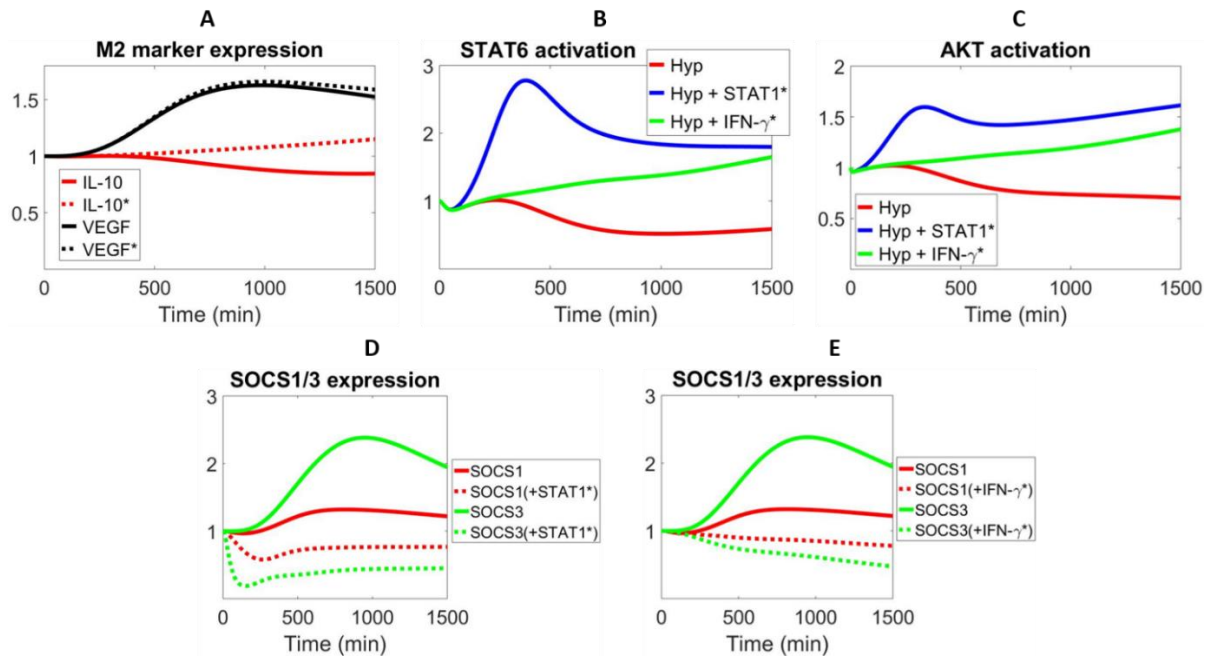

**Figure S6. Temporal response of M2 markers and transcription factors under hypoxia.** (A) Inhibition of IFN- $\gamma$  production under hypoxia (dashed lines) can upregulate the expression of M2 markers IL-10 and VEGF (marginal effect), compared to hypoxia alone (solid lines). Simulations show stronger temporal activation of (B) pSTAT6 and (C) pAKT under hypoxia in combination with IFN- $\gamma$  inhibition or STAT1 inhibition, compared to hypoxia alone. SOCS1 and SOCS3 expression are reduced under hypoxia with either (D) STAT1 or (E) IFN- $\gamma$  inhibition (dashed lines), compared to hypoxia alone (solid lines). STAT1\* means inhibition of STAT1 activation, IFN- $\gamma$ \* means inhibition of IFN- $\gamma$  production. Inhibition of IFN- $\gamma$  is simulated by setting its production rate to 10% of the original value; STAT1 inhibition is simulated as a 90% decrease in the binding rate between STAT1 and activated IFN- $\gamma$  receptor complex. (A-E) Expression levels are normalized to their respective  $t=0$  values (e.g. normoxia, unstimulated). Hyp – hypoxia. All simulation results are protein levels.
